# Supplementary material for: Iron-catalyzed arylation of benzoazoles with aromatic aldehydes using oxygen as oxidant
Source: Royal Society of Chemistry journal article supplement (doi:10.1039/c2gc35457h), 2012-01-01

## Supporting information for

### Iron-Catalyzed Arylation of Benzoazoles with Aromatic Aldehydes Using Oxygen as Oxidant

Saiwen Liu,<sup>a</sup> Ru Chen,<sup>a</sup> Xiangyu Guo,<sup>b</sup> Huiqiong Yang,<sup>a</sup> Guo-Jun Deng<sup>a, \*</sup> and Chao-Jun Li<sup>b, \*</sup>

<sup>a</sup> Key Laboratory of Environmentally Friendly Chemistry and Application of Ministry of Education, College of Chemistry, Xiangtan University, Xiangtan 411105, China

E-mail: gjdeng@xtu.edu.cn

<sup>b</sup> Department of Chemistry, McGill University, 801 Sherbrooke St. West, Montreal, Quebec H3A 2K6, Canada

Email: cj.li@mcgill.ca

## Table of Contents

|                                                                              |              |
|------------------------------------------------------------------------------|--------------|
| <b>1. General information</b>                                                | <b>2</b>     |
| <b>2. General experimental procedure for direct arylation</b>                | <b>2</b>     |
| <b>3. Characterization data of products</b>                                  | <b>2-14</b>  |
| <b>4. References</b>                                                         | <b>14</b>    |
| <b>5. Copies of <sup>1</sup>H and <sup>13</sup>C NMR spectra of products</b> | <b>15-41</b> |

## General information:

All experiments were carried out under an atmosphere of oxygen. Flash column chromatography was performed over silica gel 40-60  $\mu\text{m}$ .  $^1\text{H}$  NMR and  $^{13}\text{C}$  NMR spectra were recorded on Bruker-AV (400 and 100 MHz, respectively) instrument internally referenced to  $\text{SiMe}_4$  or chloroform signals. MS analyses were performed on Agilent 5975 GC-MS instrument (EI). The new compounds were characterized by  $^1\text{H}$  NMR,  $^{13}\text{C}$  NMR, MS and HRMS. The structure of known compounds were further corroborated by comparing their  $^1\text{H}$  NMR,  $^{13}\text{C}$  NMR data and MS data with those of literature. All reagents were used as received from commercial sources without further purification.  $\text{FeSO}_4 \cdot 7\text{H}_2\text{O}$  and  $\text{Fe}_2(\text{SO}_4)_3 \cdot x\text{H}_2\text{O}$  were purchased from Alfa Aesar (99.999% and Reagent Grade, respectively).

### General procedure: 2-Phenylbenzothiazole (3aa):

An oven-dried pressure tube (10 mL) was charged with  $\text{FeSO}_4 \cdot 7\text{H}_2\text{O}$  (11.1 mg, 0.04 mmol), benzaldehyde (**2a**, 20.4  $\mu\text{L}$ , 0.2 mmol), benzothiazole (**1a**, 32.7  $\mu\text{L}$ , 0.3 mmol),  $\text{H}_2\text{O}$  (0.2 mL) and diglyme (0.2 mL). The reaction vessel was flushed with oxygen and sealed. The resulting solution was heated to 150  $^\circ\text{C}$  for 20 h. After cooling to room temperature, the volatiles were removed under vacuum and the residue was purified by column chromatography (silica gel, petroleum ether/ethyl acetate = 98:2) to give **3aa** as white solid; yield: 37.6 mg (89%).

### 2-Phenylbenzothiazole (3aa, CAS: 883-93-2) <sup>[1]</sup>

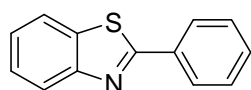

$^1\text{H}$  NMR (400 MHz,  $\text{CDCl}_3$ , ppm)  $\delta$  8.11 (d,  $J = 7.9$  Hz, 3H), 7.92 (d,  $J = 7.9$  Hz, 1H), 7.51 (m, 4H), 7.40 (t,  $J = 7.5$  Hz, 1H);  $^{13}\text{C}$  NMR (100 MHz,  $\text{CDCl}_3$ , ppm)  $\delta$  168.0, 154.2, 135.1, 133.7, 130.9, 129.0, 127.6, 126.3, 125.2, 123.3, 121.6; MS (EI)  $m/z$  (%) 211 (100), 108, 82, 69.

### 2-*p*-Tolylbenzothiazole (3ab, CAS: 16112-21-3) <sup>[1]</sup>

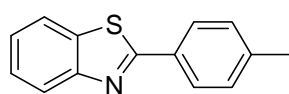

The reaction was conducted with 4-methylbenzaldehyde (**2b**, 23.6  $\mu\text{L}$ , 0.2 mmol) and benzothiazole (**1a**, 32.7  $\mu\text{L}$ , 0.3 mmol),  $\text{FeSO}_4 \cdot 7\text{H}_2\text{O}$  (11.1 mg, 0.04 mmol),  $\text{H}_2\text{O}$  (0.2 mL) and

diglyme (0.2 mL) under oxygen at 150 °C for 20 h. The crude mixture was purified by flash column chromatography on silica (petroleum ether/ethyl acetate = 98:2) to provide 39.2 mg, 87% yield of **3ab** as white solid.

<sup>1</sup>H NMR (400 MHz, CDCl<sub>3</sub>, ppm) δ 8.06 (d, *J* = 8.1 Hz, 1H), 7.99 (d, *J* = 7.9 Hz, 2H), 7.90 (d, *J* = 7.9 Hz, 1H), 7.48 (t, *J* = 7.6 Hz, 1H), 7.37 (t, *J* = 7.5 Hz, 1H), 7.30 (d, *J* = 7.8 Hz, 2H), 2.43 (s, 3H); <sup>13</sup>C NMR (100 MHz, CDCl<sub>3</sub>, ppm) δ 167.2, 153.3, 140.4, 134.1, 130.1, 128.7, 126.6, 125.2, 124.0, 122.1, 120.6, 20.5; MS (EI) *m/z* (%) 225 (100), 108, 91, 69.

### 2-(4-Methoxyphenyl)benzothiazole (**3ac**, CAS: 6265-92-5) <sup>[1]</sup>

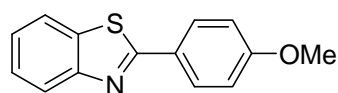

The reaction was conducted with 4-methoxybenzaldehyde (**2c**, 24.3 μL, 0.2 mmol) and benzothiazole (**1a**, 32.7 μL, 0.3 mmol), FeSO<sub>4</sub>·7H<sub>2</sub>O (11.1 mg, 0.04 mmol), H<sub>2</sub>O (0.2 mL) and diglyme (0.2 mL) under oxygen at 150 °C for 20 h. The crude mixture was purified by flash column chromatography on silica (petroleum ether/ethyl acetate = 98:2) to provide 41.0 mg, 85% yield of **3ac** as white solid.

<sup>1</sup>H NMR (400 MHz, CDCl<sub>3</sub>, ppm) δ 8.05 (d, *J* = 8.7 Hz, 3H), 7.88 (d, *J* = 7.9 Hz, 1H), 7.47 (t, *J* = 7.5 Hz, 1H), 7.36 (t, *J* = 7.5 Hz, 1H), 7.00 (d, *J* = 8.7 Hz, 2H), 3.89 (s, 3H); <sup>13</sup>C NMR (100 MHz, CDCl<sub>3</sub>, ppm) δ 167.8, 162.0, 154.3, 135.0, 129.1, 126.6, 126.2, 124.8, 122.9, 121.5, 114.4, 55.5; MS (EI) *m/z* (%) 241 (100), 226, 198, 69.

### 2-(4-*tert*-Butylphenyl)benzothiazole (**3ad**, CAS: 56048-52-3) <sup>[1]</sup>

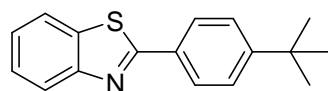

The reaction was conducted with 4-*tert*-butylbenzaldehyde (**2d**, 33.4 μL, 0.2 mmol) and benzothiazole (**1a**, 32.7 μL, 0.3 mmol), FeSO<sub>4</sub>·7H<sub>2</sub>O (11.1 mg, 0.04 mmol), H<sub>2</sub>O (0.2 mL) and diglyme (0.2 mL) under oxygen at 150 °C for 20 h. The crude mixture was purified by flash column chromatography on silica (petroleum ether/ethyl acetate = 98:2) to provide 45.9 mg, 86% yield of **3ad** as white solid.

<sup>1</sup>H NMR (400 MHz, CDCl<sub>3</sub>, ppm) δ 8.05 (m, 3H), 7.90 (d, *J* = 7.9 Hz, 1H), 7.50 (m, 3H), 7.37 (m,

1H), 1.37 (s, 9H); <sup>13</sup>C NMR (100 MHz, CDCl<sub>3</sub>, ppm) δ 167.2, 153.6, 153.3, 134.1, 130.0, 126.4, 125.2, 125.0, 124.0, 122.2, 120.6, 34.0, 30.2; MS (EI) *m/z* (%) 267, 252 (100), 236, 224, 111.

***N*-(4-(Benzothiazol-2-yl)phenyl)-*N*-phenylbenzenamine (3ae)**

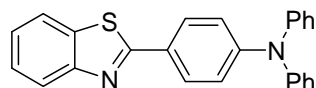

The reaction was conducted with 4-(diphenylamino)benzaldehyde (**2e**, 54.6 mg, 0.2 mmol) and benzothiazole (**1a**, 32.7 μL, 0.3 mmol), FeSO<sub>4</sub>·7H<sub>2</sub>O (11.1 mg, 0.04 mmol), H<sub>2</sub>O (0.2 mL) and dimethyl sulfoxide (0.2 mL) under oxygen at 150 °C for 20 h. The crude mixture was purified by flash column chromatography on silica (petroleum ether/ethyl acetate = 98:2) to provide 60.1 mg, 80% yield of **3ae** as white solid.

<sup>1</sup>H NMR (400 MHz, CDCl<sub>3</sub>, ppm) δ 8.06 (d, *J* = 7.6 Hz, 1H), 7.95 (d, *J* = 8.3 Hz, 2H), 7.87 (d, *J* = 7.9 Hz, 1H), 7.48 (t, *J* = 7.4 Hz, 1H), 7.38-7.30 (m, 5H), 7.18-7.09 (m, 8H); <sup>13</sup>C NMR (100 MHz, CDCl<sub>3</sub>, ppm) δ 167.8, 154.3, 150.5, 147.0, 134.9, 129.5, 128.6, 126.6, 126.2, 125.5, 124.7, 124.1, 122.8, 121.8, 121.5; MS (EI) *m/z* (%) 378 (100), 253, 207, 189, 77; HRMS calcd. for : C<sub>25</sub>H<sub>19</sub>N<sub>2</sub>S [M+1]<sup>+</sup> 379.1264, found 379.1259.

**4-(Benzothiazol-2-yl)-*N,N*-dimethylaniline (3af, CAS: 10205-56-8) <sup>[2]</sup>**

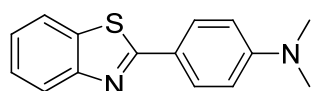

The reaction was conducted with 4-(dimethylamino)benzaldehyde (**2f**, 29.8 mg, 0.2 mmol) and benzothiazole (**1a**, 32.7 μL, 0.3 mmol), FeSO<sub>4</sub>·7H<sub>2</sub>O (11.1 mg, 0.04 mmol), H<sub>2</sub>O (0.2 mL) and dimethyl sulfoxide (0.2 mL) under oxygen at 150 °C for 20 h. The crude mixture was purified by flash column chromatography on silica (petroleum ether/ethyl acetate = 98:2) to provide 26.4 mg, 52% yield of **3af** as yellow solid.

<sup>1</sup>H NMR (400 MHz, CDCl<sub>3</sub>, ppm) δ 8.02-7.98 (m, 3H), 7.84 (d, *J* = 7.9 Hz, 1H), 7.44 (t, *J* = 7.6 Hz, 1H), 7.31 (t, *J* = 7.5 Hz, 1H), 6.76 (d, *J* = 8.7 Hz, 2H), 3.07 (s, 6H); <sup>13</sup>C NMR (100 MHz, CDCl<sub>3</sub>, ppm) δ 168.8, 154.4, 152.3, 134.6, 128.9, 126.0, 124.2, 122.3, 121.5, 121.3, 111.8, 40.2; MS (EI) *m/z* (%) 254 (100), 238, 210, 145, 127.

**2-(4-Fluorophenyl)benzothiazole (3ag, CAS: 1629-26-1)** <sup>[1]</sup>

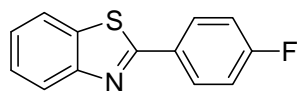

The reaction was conducted with 4-fluorobenzaldehyde (**2g**, 21.4  $\mu$ L, 0.2 mmol) and benzothiazole (**1a**, 32.7  $\mu$ L, 0.3 mmol),  $\text{FeSO}_4 \cdot 7\text{H}_2\text{O}$  (11.1 mg, 0.04 mmol),  $\text{H}_2\text{O}$  (0.2 mL) and diglyme (0.2 mL) under oxygen at 150  $^\circ\text{C}$  for 20 h. The crude mixture was purified by flash column chromatography on silica (petroleum ether/ethyl acetate = 98:2) to provide 40.3 mg, 88% yield of **3ag** as white solid.

$^1\text{H}$  NMR (400 MHz,  $\text{CDCl}_3$ , ppm)  $\delta$  8.11-8.06 (m, 3H), 7.91 (d,  $J$  = 7.9 Hz, 1H), 7.50 (t,  $J$  = 7.5 Hz, 1H), 7.39 (t,  $J$  = 7.5 Hz, 1H), 7.19 (t,  $J$  = 8.5 Hz, 2H);  $^{13}\text{C}$  NMR (100 MHz,  $\text{CDCl}_3$ , ppm)  $\delta$  166.7, 164.5 (d,  $J$  = 250.3 Hz), 154.2, 135.1, 130.1 (d,  $J$  = 29.0 Hz), 129.6 (d,  $J$  = 8.7 Hz), 126.4, 125.2, 123.3, 121.6, 116.1 (d,  $J$  = 22.0 Hz); MS (EI)  $m/z$  (%) 229 (100), 108, 82, 69.

**2-(4-Chlorophenyl)benzothiazole (3ah, CAS: 6265-91-4)** <sup>[1]</sup>

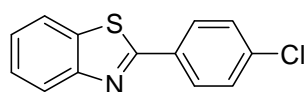

The reaction was conducted with 4-chlorobenzaldehyde (**2h**, 28 mg, 0.2 mmol) and benzothiazole (**1a**, 32.7  $\mu$ L, 0.3 mmol),  $\text{FeSO}_4 \cdot 7\text{H}_2\text{O}$  (11.1 mg, 0.04 mmol),  $\text{H}_2\text{O}$  (0.2 mL) and diglyme (0.2 mL) under oxygen at 150  $^\circ\text{C}$  for 20 h. The crude mixture was purified by flash column chromatography on silica (petroleum ether/ethyl acetate = 98:2) to provide 40.3 mg, 82% yield of **3ah** as white solid.

$^1\text{H}$  NMR (400 MHz,  $\text{CDCl}_3$ , ppm)  $\delta$  8.09-8.03 (m, 3H), 7.91 (d,  $J$  = 7.9 Hz, 1H), 7.53-7.49 (m, 3H), 7.41 (t,  $J$  = 7.5 Hz, 1H);  $^{13}\text{C}$  NMR (100 MHz,  $\text{CDCl}_3$ , ppm)  $\delta$  166.6, 154.2, 137.1, 135.2, 132.2, 129.3, 128.8, 126.5, 125.4, 123.4, 121.7; MS (EI)  $m/z$  (%) 245 (100), 210, 108, 82, 69.

**2-(4-Bromophenyl)benzothiazole (3ai, CAS: 19654-19-4)** <sup>[1]</sup>

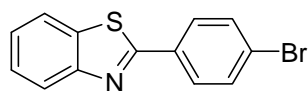

The reaction was conducted with 4-bromobenzaldehyde (**2i**, 37.0 mg, 0.2 mmol) and benzothiazole (**1a**, 32.7  $\mu$ L, 0.3 mmol),  $\text{FeSO}_4 \cdot 7\text{H}_2\text{O}$  (11.1 mg, 0.04 mmol),  $\text{H}_2\text{O}$  (0.2 mL) and

dimethyl sulfoxide (0.2 mL) under oxygen at 150 °C for 20 h. The crude mixture was purified by flash column chromatography on silica (petroleum ether/ethyl acetate = 98:2) to provide 41.2 mg, 71% yield of **3ai** as white solid.

<sup>1</sup>H NMR (400 MHz, CDCl<sub>3</sub>, ppm) δ 8.08 (d, *J* = 8.1 Hz, 1H), 7.97 (d, *J* = 8.4 Hz, 2H), 7.91 (d, *J* = 7.9 Hz, 1H), 7.64 (d, *J* = 8.4 Hz, 2H), 7.51 (t, *J* = 7.6 Hz, 1H), 7.41 (t, *J* = 7.5 Hz, 1H); <sup>13</sup>C NMR (100 MHz, CDCl<sub>3</sub>, ppm) δ 165.7, 153.2, 134.1, 131.7, 131.3, 128.0, 125.5, 124.5, 124.5, 122.4, 120.7; MS (EI) *m/z* (%) 291 (100), 210, 108, 82, 69.

### 2-(4-(Methylsulfonyl)phenyl)benzothiazole (**3aj**, CAS: 67363-00-2)

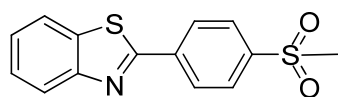

The reaction was conducted with 4-(methylsulfonyl)benzaldehyde (**2j**, 36.8 mg, 0.2 mmol) and benzothiazole (**1a**, 32.7 μL, 0.3 mmol), FeSO<sub>4</sub>·7H<sub>2</sub>O (11.1 mg, 0.04 mmol), H<sub>2</sub>O (0.2 mL) and dimethyl sulfoxide (0.2 mL) under oxygen at 150 °C for 20 h. The crude mixture was purified by flash column chromatography on silica (petroleum ether/ethyl acetate = 98:2) to provide 43.4 mg, 75% yield of **3aj** as white solid.

<sup>1</sup>H NMR (400 MHz, CDCl<sub>3</sub>, ppm) δ 8.31 (d, *J* = 8.3 Hz, 2H), 8.14 (d, *J* = 8.1 Hz, 1H), 8.08 (d, *J* = 8.3 Hz, 2H), 7.96 (d, *J* = 7.9 Hz, 1H), 7.56 (t, *J* = 7.2 Hz, 1H), 7.47 (t, *J* = 7.5 Hz, 1H), 3.11 (s, 3H); <sup>13</sup>C NMR (100 MHz, CDCl<sub>3</sub>, ppm) δ 164.3, 153.1, 141.4, 137.5, 134.4, 127.3, 127.2, 125.9, 125.1, 122.9, 120.8, 43.5; MS (EI) *m/z* (%) 289 (100), 226, 210, 198, 139.

### 2-(Naphthalen-2-yl)benzothiazole (**3ak**, CAS: 56048-51-2) <sup>[1]</sup>

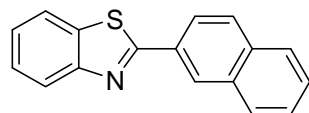

The reaction was conducted with 2-naphthaldehyde (**2k**, 31.2 mg, 0.2 mmol) and benzothiazole (**1a**, 32.7 μL, 0.3 mmol), FeSO<sub>4</sub>·7H<sub>2</sub>O (11.1 mg, 0.04 mmol), H<sub>2</sub>O (0.2 mL) and diglyme (0.2 mL) under oxygen at 150 °C for 20 h. The crude mixture was purified by flash column chromatography on silica (petroleum ether/ethyl acetate = 98:2) to provide 36.5 mg, 70% yield of **3ak** as white solid.

<sup>1</sup>H NMR (400 MHz, CDCl<sub>3</sub>, ppm) δ 8.66 (s, 1H), 8.25 (d, *J* = 8.5 Hz, 1H), 8.20 (d, *J* = 8.2 Hz,

1H), 8.01-7.99 (m, 4H), 7.58-7.55 (m, 3H), 7.44 (t,  $J = 7.6$  Hz, 1H);  $^{13}\text{C}$  NMR (100 MHz,  $\text{CDCl}_3$ , ppm)  $\delta$  168.1, 154.3, 135.2, 134.7, 133.3, 131.1, 128.9, 128.8, 127.9, 127.6, 127.5, 126.9, 126.4, 125.3, 124.5, 123.3, 121.6; MS (EI)  $m/z$  (%) 261 (100), 130, 108, 69.

**2-*m*-Tolylbenzothiazole (3al, CAS: 1211-32-1)** <sup>[3]</sup>

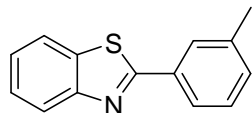

The reaction was conducted with 3-methylbenzaldehyde (**2l**, 23.6  $\mu\text{L}$ , 0.2 mmol) and benzothiazole (**1a**, 32.7  $\mu\text{L}$ , 0.3 mmol),  $\text{FeSO}_4 \cdot 7\text{H}_2\text{O}$  (11.1 mg, 0.04 mmol),  $\text{H}_2\text{O}$  (0.2 mL) and diglyme (0.2 mL) under oxygen at 150  $^\circ\text{C}$  for 20 h. The crude mixture was purified by flash column chromatography on silica (petroleum ether/ethyl acetate = 98:2) to provide 32.0 mg, 71% yield of **3al** as white solid.

$^1\text{H}$  NMR (400 MHz,  $\text{CDCl}_3$ , ppm)  $\delta$  8.01 (d,  $J = 8.1$  Hz, 1H), 7.96 (s, 1H), 7.87-7.93 (m, 2H), 7.50 (t,  $J = 7.7$  Hz, 1H), 7.39 (t,  $J = 7.6$  Hz, 2H), 7.32 (d,  $J = 7.4$  Hz, 1H), 2.47 (s, 3H);  $^{13}\text{C}$  NMR (100 MHz,  $\text{CDCl}_3$ , ppm)  $\delta$  168.3, 154.2, 138.9, 135.1, 133.6, 131.8, 128.9, 128.1, 126.3, 125.1, 124.9, 123.2, 121.6, 21.3; MS (EI)  $m/z$  (%) 225 (100), 210, 108, 82, 69.

**2-(2-Chlorophenyl)benzothiazole (3am, CAS: 6269-46-1)** <sup>[4]</sup>

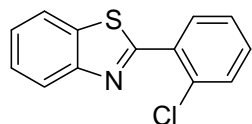

The reaction was conducted with 2-chlorobenzaldehyde (**2m**, 23.6  $\mu\text{L}$ , 0.2 mmol) and benzothiazole (**1a**, 32.7  $\mu\text{L}$ , 0.3 mmol),  $\text{FeSO}_4 \cdot 7\text{H}_2\text{O}$  (11.1 mg, 0.04 mmol),  $\text{H}_2\text{O}$  (0.2 mL) and diglyme (0.2 mL) under oxygen at 150  $^\circ\text{C}$  for 20 h. The crude mixture was purified by flash column chromatography on silica (petroleum ether/ethyl acetate = 98:2) to provide 35.7 mg, 72% yield of **3am** as white solid.

$^1\text{H}$  NMR (400 MHz,  $\text{CDCl}_3$ , ppm)  $\delta$  8.23-8.21 (m, 1H), 8.15 (d,  $J = 8.1$  Hz, 1H), 7.96 (d,  $J = 7.9$  Hz, 1H), 7.55-7.52 (m, 2H), 7.46-7.41 (m, 3H);  $^{13}\text{C}$  NMR (100 MHz,  $\text{CDCl}_3$ , ppm)  $\delta$  164.2, 152.6, 136.2, 132.8, 132.4, 131.8, 131.1, 130.8, 127.1, 126.3, 125.5, 123.5, 121.4; MS (EI)  $m/z$  (%) 245 (100), 210, 108, 82, 69.

**2-(3,4,5-Trimethoxyphenyl)benzothiazole (3an, CAS: 76088-45-4)** <sup>[5]</sup>

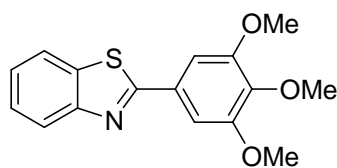

The reaction was conducted with 3,4,5-trimethoxybenzaldehyde (**2n**, 39.2 mg, 0.2 mmol) and benzothiazole (**1a**, 32.7  $\mu$ L, 0.3 mmol),  $\text{FeSO}_4 \cdot 7\text{H}_2\text{O}$  (11.1 mg, 0.04 mmol),  $\text{H}_2\text{O}$  (0.2 mL) and dimethyl sulfoxide (0.2 mL) under oxygen at 150 °C for 20 h. The crude mixture was purified by flash column chromatography on silica (petroleum ether/ethyl acetate = 98:2) to provide 44.0 mg, 83% yield of **3an** as white solid.

$^1\text{H}$  NMR (400 MHz,  $\text{CDCl}_3$ , ppm)  $\delta$  8.08 (d,  $J$  = 8.1 Hz, 1H), 7.90 (d,  $J$  = 7.9 Hz, 1H), 7.51 (t,  $J$  = 7.5 Hz, 1H), 7.40 (t,  $J$  = 7.6 Hz, 1H), 7.35 (s, 2H), 4.00 (s, 6H), 3.93 (s, 3H);  $^{13}\text{C}$  NMR (100 MHz,  $\text{CDCl}_3$ , ppm)  $\delta$  167.7, 154.1, 153.6, 140.9, 135.1, 129.0, 126.3, 125.1, 123.1, 121.5, 105.1, 60.9, 56.4; MS (EI)  $m/z$  (%) 301 (100), 281, 258, 228, 172.

**4-(Benzothiazol-2-yl)-2-methoxyphenol (3ao, CAS: 36341-25-0)** <sup>[6]</sup>

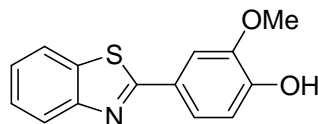

The reaction was conducted with 4-hydroxy-3-methoxybenzaldehyde (**2o**, 30.4 mg, 0.2 mmol) and benzothiazole (**1a**, 32.7  $\mu$ L, 0.3 mmol),  $\text{FeSO}_4 \cdot 7\text{H}_2\text{O}$  (11.1 mg, 0.04 mmol),  $\text{H}_2\text{O}$  (0.2 mL) and dimethyl sulfoxide (0.2 mL) under oxygen at 150 °C for 20 h. The crude mixture was purified by flash column chromatography on silica (petroleum ether/ethyl acetate = 98:2) to provide 31.9 mg, 62% yield of **3ao** as white solid.

$^1\text{H}$  NMR (400 MHz,  $\text{CDCl}_3$ , ppm)  $\delta$  8.04 (d,  $J$  = 8.1 Hz, 1H), 7.88 (d,  $J$  = 7.9 Hz, 1H), 7.75 (s, 1H), 7.55 (d,  $J$  = 8.2 Hz, 1H), 7.48 (t,  $J$  = 7.5 Hz, 1H), 7.36 (t,  $J$  = 7.4 Hz, 1H), 7.01 (d,  $J$  = 8.3 Hz, 1H), 4.04 (s, 3H);  $^{13}\text{C}$  NMR (100 MHz,  $\text{CDCl}_3$ , ppm)  $\delta$  168.2, 154.0, 148.7, 147.0, 134.8, 126.3, 126.2, 124.9, 122.8, 122.0, 121.5, 114.8, 109.5, 56.3; MS (EI)  $m/z$  (%) 257 (100), 242, 214, 186, 129.

**2-(Pyridin-2-yl)benzothiazole (3ap, CAS: 716-80-3)** <sup>[5]</sup>



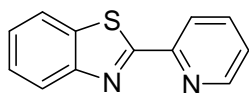

The reaction was conducted with picolinaldehyde (**2p**, 19.0  $\mu$ L, 0.2 mmol) and benzothiazole (**1a**, 32.7  $\mu$ L, 0.3 mmol),  $\text{FeSO}_4 \cdot 7\text{H}_2\text{O}$  (11.1 mg, 0.04 mmol),  $\text{H}_2\text{O}$  (0.2 mL) and dimethyl sulfoxide (0.2 mL) under oxygen at 150  $^\circ\text{C}$  for 20 h. The crude mixture was purified by flash column chromatography on silica (petroleum ether/ethyl acetate = 98:2) to provide 33.1 mg, 78% yield of **3ap** as yellow solid.

$^1\text{H}$  NMR (400 MHz,  $\text{CDCl}_3$ , ppm)  $\delta$  8.70-8.69 (m, 1H), 8.39 (d,  $J$  = 7.9 Hz, 1H), 8.10 (d,  $J$  = 8.1 Hz, 1H), 7.97 (d,  $J$  = 7.9 Hz, 1H), 7.86 (t,  $J$  = 7.2 Hz, 1H), 7.51 (t,  $J$  = 7.5 Hz, 1H), 7.46-7.38 (m, 2H);  $^{13}\text{C}$  NMR (100 MHz,  $\text{CDCl}_3$ , ppm)  $\delta$  169.4, 154.4, 151.5, 149.7, 136.9, 136.2, 126.2, 125.6, 125.2, 123.6, 122.0, 120.8; MS (EI)  $m/z$  (%) 212 (100), 186, 168, 108, 78.

#### 2-(Furan-2-yl)benzothiazole (**3aq**, CAS: 1569-98-8) <sup>[6]</sup>

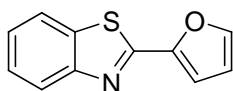

The reaction was conducted with furan-2-carbaldehyde (**2q**, 16.6  $\mu$ L, 0.2 mmol) and benzothiazole (**1a**, 32.7  $\mu$ L, 0.3 mmol),  $\text{FeSO}_4 \cdot 7\text{H}_2\text{O}$  (11.1 mg, 0.04 mmol),  $\text{H}_2\text{O}$  (0.2 mL) and dimethyl sulfoxide (0.2 mL) under oxygen at 150  $^\circ\text{C}$  for 20 h. The crude mixture was purified by flash column chromatography on silica (petroleum ether/ethyl acetate = 98:2) to provide 21.3 mg, 53% yield of **3aq** as white solid.

$^1\text{H}$  NMR (400 MHz,  $\text{CDCl}_3$ , ppm)  $\delta$  8.07 (d,  $J$  = 7.9 Hz, 1H), 7.90 (d,  $J$  = 7.9 Hz, 1H), 7.62 (s, 1H), 7.50 (t,  $J$  = 7.3 Hz, 1H), 7.39 (t,  $J$  = 7.9 Hz, 1H), 7.24 (d,  $J$  = 12.1 Hz, 1H), 6.61 (s, 1H);  $^{13}\text{C}$  NMR (100 MHz,  $\text{CDCl}_3$ , ppm)  $\delta$  157.6, 153.8, 148.9, 144.7, 134.4, 126.5, 125.2, 123.2, 121.6, 112.5, 111.4; MS (EI)  $m/z$  (%) 201 (100), 173, 146, 108, 69.

#### 2-Heptylbenzothiazole (**3ar**, CAS: 69938-51-8) <sup>[7]</sup>

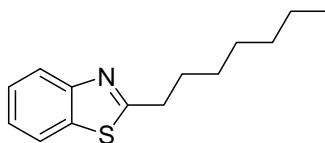

The reaction was conducted with octanal (**2r**, 62.4  $\mu$ L, 0.4 mmol) and benzothiazole (**1a**, 21.8  $\mu$ L,

0.2 mmol), FeSO<sub>4</sub>·7H<sub>2</sub>O (11.1 mg, 0.04 mmol), H<sub>2</sub>O (0.2 mL) and diglyme (0.2 mL) under oxygen at 150 °C for 30 h. The crude mixture was purified by flash column chromatography on silica (petroleum ether/ethyl acetate = 98:2) to provide 14.8 mg, 30% yield of **3ar** as white solid.

<sup>1</sup>H NMR (400 MHz, CDCl<sub>3</sub>, ppm) δ 7.99 (d, *J* = 7.2 Hz, 1H), 7.86 (d, *J* = 7.2 Hz, 1H), 7.47 (m, 1H), 7.37 (m, 1H), 3.14 (m, 2H), 1.90 (m, 2H), 1.31-1.45 (m, 8H), 0.90 (m, 3H); <sup>13</sup>C NMR (100 MHz, CDCl<sub>3</sub>, ppm) δ 172.5, 153.3, 135.2, 125.9, 124.6, 122.5, 121.5, 34.4, 31.7, 29.8, 29.2, 29.0, 22.6, 14.1; MS (EI) *m/z* (%) 233, 204, 162, 149 (100).

### 6-Methyl-2-phenylbenzothiazole (**3ba**, CAS: 10205-58-0) <sup>[8]</sup>

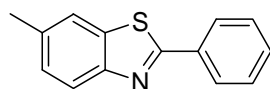

The reaction was conducted with benzaldehyde (**2a**, 20.4 μL, 0.2 mmol) and 6-methylbenzothiazole (**1b**, 34.4 μL, 0.3 mmol), FeSO<sub>4</sub>·7H<sub>2</sub>O (11.1 mg, 0.04 mmol), H<sub>2</sub>O (0.2 mL) and diglyme (0.2 mL) under oxygen at 150 °C for 20 h. The crude mixture was purified by flash column chromatography on silica (petroleum ether/ethyl acetate = 98:2) to provide 45.0 mg, 78% yield of **3ba** as white solid.

<sup>1</sup>H NMR (400 MHz, CDCl<sub>3</sub>, ppm) δ 8.09-8.08 (m, 2H), 7.97 (d, *J* = 8.3 Hz, 1H), 7.71 (s, 1H), 7.50 (m, 3H), 7.31 (d, *J* = 8.2 Hz, 1H), 2.51 (s, 3H); <sup>13</sup>C NMR (100 MHz, CDCl<sub>3</sub>, ppm) δ 166.2, 152.3, 135.3, 135.3, 133.9, 130.7, 128.9, 127.9, 127.4, 122.7, 121.3, 21.5; MS (EI) *m/z* (%) 225 (100), 121, 112, 77, 69.

### 6-Methoxy-2-phenylbenzothiazole (**3ca**, CAS: 10205-69-3) <sup>[9]</sup>

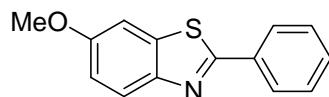

The reaction was conducted with benzaldehyde (**2a**, 20.4 μL, 0.2 mmol) and 6-methoxybenzothiazole (**1c**, 49.5 mg, 0.3 mmol), FeSO<sub>4</sub>·7H<sub>2</sub>O (11.1 mg, 0.04 mmol), H<sub>2</sub>O (0.2 mL) and diglyme (0.2 mL) under oxygen at 150 °C for 20 h. The crude mixture was purified by flash column chromatography on silica (petroleum ether/ethyl acetate = 98:2) to provide 41.9 mg, 87% yield of **3ca** as white solid.

<sup>1</sup>H NMR (400 MHz, CDCl<sub>3</sub>, ppm) δ 8.05 (m, 2H), 7.95 (d, *J* = 8.9 Hz, 1H), 7.49-7.47 (m, 3H),

7.36 (s, 1H), 7.11-7.08 (m, 1H), 3.90 (s, 3H);  $^{13}\text{C}$  NMR (100 MHz,  $\text{CDCl}_3$ , ppm)  $\delta$  165.5, 157.8, 148.7, 136.4, 133.8, 130.5, 129.0, 127.2, 123.7, 115.7, 104.2, 55.8; MS (EI)  $m/z$  (%) 241 (100), 226, 198, 95, 69.

### 6-Ethoxy-2-phenylbenzothiazole (**3da**)

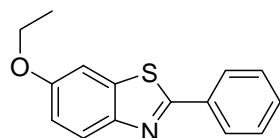

The reaction was conducted with benzaldehyde (**2a**, 20.4  $\mu\text{L}$ , 0.2 mmol) and 6-ethoxybenzothiazole (**1d**, 53.7 mg, 0.3 mmol),  $\text{FeSO}_4 \cdot 7\text{H}_2\text{O}$  (11.1 mg, 0.04 mmol),  $\text{H}_2\text{O}$  (0.2 mL) and diglyme (0.2 mL) under oxygen at 150  $^\circ\text{C}$  for 20 h. The crude mixture was purified by flash column chromatography on silica (petroleum ether/ethyl acetate = 98:2) to provide 40.8 mg, 80% yield of **3da** as white solid.

$^1\text{H}$  NMR (400 MHz,  $\text{CDCl}_3$ , ppm)  $\delta$  8.07-8.05 (m, 2H), 7.97 (d,  $J$  = 8.9 Hz, 1H), 7.49-7.48 (m, 3H), 7.36 (s, 1H), 7.08-7.11 (m, 1H), 4.11 (q,  $J$  = 6.9 Hz, 2H), 1.47 (t,  $J$  = 6.9 Hz, 3H);  $^{13}\text{C}$  NMR (100 MHz,  $\text{CDCl}_3$ , ppm)  $\delta$  165.5, 157.2, 148.6, 136.4, 133.8, 130.5, 129.0, 127.2, 123.7, 116.1, 104.8, 64.1, 14.8; MS (EI)  $m/z$  (%) 255 (100), 227, 198, 95, 69; HRMS calcd. for:  $\text{C}_{15}\text{H}_{14}\text{NOS}$   $[\text{M}+1]^+$  256.0791, found 256.0791.

### 6-Nitro-2-phenylbenzothiazole (**3ea**, CAS: 38338-23-7) <sup>[9]</sup>

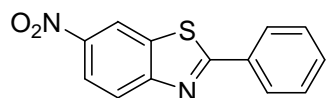

The reaction was conducted with benzaldehyde (**2a**, 20.4  $\mu\text{L}$ , 0.2 mmol) and 6-nitrobenzothiazole (**1e**, 50.4 mg, 0.3 mmol),  $\text{FeSO}_4 \cdot 7\text{H}_2\text{O}$  (11.1 mg, 0.04 mmol),  $\text{H}_2\text{O}$  (0.2 mL) and dimethyl sulfoxide (0.2 mL) under oxygen at 150  $^\circ\text{C}$  for 20 h. The crude mixture was purified by flash column chromatography on silica (petroleum ether/ethyl acetate = 98:2) to provide 33.3 mg, 65% yield of **3ea** as white solid.

$^1\text{H}$  NMR (400 MHz,  $\text{CDCl}_3$ , ppm)  $\delta$  8.85 (s, 1H), 8.37 (d,  $J$  = 8.9 Hz, 1H), 8.16-8.13 (m, 3H), 7.58-7.54 (m, 3H);  $^{13}\text{C}$  NMR (100 MHz,  $\text{CDCl}_3$ , ppm)  $\delta$  172.8, 156.9, 144.1, 134.4, 131.9, 131.2, 128.3, 127.0, 122.4, 120.9, 117.2; MS (EI)  $m/z$  (%) 256 (100), 226, 210, 107, 63.

**2-Phenylbenzoxazole (3fa, CAS: 833-50-1)** <sup>[10]</sup>

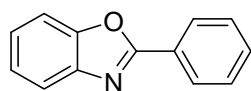

The reaction was conducted with benzaldehyde (**2a**, 20.4  $\mu$ L, 0.2 mmol) and benzoxazole (**1f**, 32.1 mg, 0.3 mmol),  $\text{Fe}_2(\text{SO}_4)_3 \cdot x\text{H}_2\text{O}$  (16.0 mg, 0.04 mmol), tris(pentafluorophenyl)phosphine (10.6 mg, 0.02 mmol), diglyme (0.4mL) under air at 110  $^\circ\text{C}$  for 36 h. The crude mixture was purified by flash column chromatography on silica (petroleum ether/ethyl acetate = 98:2) to provide 27.3 mg, 70% yield of **3fa** as white solid.

$^1\text{H}$  NMR (400 MHz,  $\text{CDCl}_3$ , ppm)  $\delta$  8.28-8.27 (m, 2H), 7.80-7.78 (m, 1H), 7.61-7.54 (m, 4H), 7.38-7.36 (m, 2H);  $^{13}\text{C}$  NMR (100 MHz,  $\text{CDCl}_3$ , ppm)  $\delta$  163.0, 150.8, 142.1, 131.5, 128.9, 127.6, 127.2, 125.1, 124.6, 120.0, 110.6; MS (EI)  $m/z$  (%) 195 (100), 167, 139, 77, 63.

**5-Methyl-2-phenylbenzoxazole (3ga, CAS: 7420-86-2)** <sup>[11]</sup>

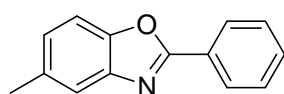

The reaction was conducted with benzaldehyde (**2a**, 20.4  $\mu$ L, 0.2 mmol) and 5-methylbenzoxazole (**1g**, 39.9 mg, 0.3 mmol),  $\text{Fe}_2(\text{SO}_4)_3 \cdot x\text{H}_2\text{O}$  (16.0 mg, 0.04 mmol), tris(pentafluorophenyl)phosphine (10.6 mg, 0.02 mmol), diglyme (0.4mL) under air at 110  $^\circ\text{C}$  for 36 h. The crude mixture was purified by flash column chromatography on silica (petroleum ether/ethyl acetate = 98:2) to provide 31.8 mg, 76% yield of **3ga** as white solid.

$^1\text{H}$  NMR (400 MHz,  $\text{CDCl}_3$ , ppm)  $\delta$  8.27-8.25 (m, 2H), 7.57-7.53 (m, 4H), 7.46 (d,  $J$  = 8.3 Hz, 1H), 7.17 (d,  $J$  = 8.2 Hz, 1H), 2.50 (s, 3H);  $^{13}\text{C}$  NMR (100 MHz,  $\text{CDCl}_3$ , ppm)  $\delta$  163.1, 149.0, 142.3, 134.4, 131.4, 128.9, 127.6, 127.3, 126.2, 119.9, 109.9, 21.5; MS (EI)  $m/z$  (%) 209 (100), 180, 105, 78, 51.

**6-Methyl-2-phenylbenzoxazole (3ha, CAS: 14016-00-3)** <sup>[12]</sup>

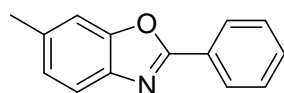

The reaction was conducted with benzaldehyde (**2a**, 20.4  $\mu$ L, 0.2 mmol) and

6-methylbenzoxazole (**1h**, 39.9 mg, 0.3 mmol), Fe<sub>2</sub>(SO<sub>4</sub>)<sub>3</sub>·xH<sub>2</sub>O (16.0 mg, 0.04 mmol), tris(pentafluorophenyl)phosphine (10.6 mg, 0.02 mmol), diglyme (0.4mL) under air at 110 °C for 36 h. The crude mixture was purified by flash column chromatography on silica (petroleum ether/ethyl acetate = 98:2) to provide 30.1 mg, 72% yield of **3ha** as white solid.

<sup>1</sup>H NMR (400 MHz, CDCl<sub>3</sub>, ppm) δ 8.25-8.24 (m, 2H), 7.65 (d, *J* = 8.1 Hz, 1H), 7.53-7.52 (m, 3H), 7.40 (s, 1H), 7.18 (d, *J* = 8.0 Hz, 1H), 2.56 (s, 3H); <sup>13</sup>C NMR (100 MHz, CDCl<sub>3</sub>, ppm) δ 162.6, 151.1, 140.0, 135.5, 131.2, 128.8, 127.5, 127.4, 125.8, 119.3, 110.7, 21.7; MS (EI) *m/z* (%) 209 (100), 180, 105, 78, 51.

### 5-Chloro-2-phenylbenzoxazole (**3ia**, CAS: 1019-90-5) <sup>[13]</sup>

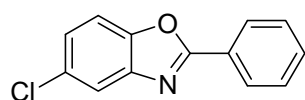

The reaction was conducted with benzaldehyde (**2a**, 20.4 μL, 0.2 mmol) and 5-chlorobenzoxazole (**1i**, 46.2 mg, 0.3 mmol), Fe<sub>2</sub>(SO<sub>4</sub>)<sub>3</sub>·xH<sub>2</sub>O (16.0 mg, 0.04 mmol), tris(pentafluorophenyl)phosphine (10.6 mg, 0.02 mmol), diglyme (0.4mL) under air at 110 °C for 36 h. The crude mixture was purified by flash column chromatography on silica (petroleum ether/ethyl acetate = 98:2) to provide 34.5 mg, 75% yield of **3ia** as white solid.

<sup>1</sup>H NMR (400 MHz, CDCl<sub>3</sub>, ppm) δ 8.25 (d, *J* = 6.4 Hz, 2H), 7.76 (s, 1H), 7.55-7.50 (m, 4H), 7.33 (d, *J* = 8.5 Hz, 1H); <sup>13</sup>C NMR (100 MHz, CDCl<sub>3</sub>, ppm) δ 164.4, 149.4, 143.3, 131.9, 130.1, 128.9, 127.8, 126.8, 125.3, 120.0, 111.2; MS (EI) *m/z* (%) 229 (100), 201, 166, 126, 98.

### 6-Nitro-2-phenylbenzoxazole (**3ja**, CAS: 3164-28-1) <sup>[14]</sup>

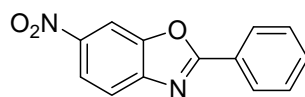

The reaction was conducted with benzaldehyde (**2a**, 20.4 μL, 0.2 mmol) and 6-nitrobenzoxazole (**1j**, 49.2 mg, 0.3 mmol), Fe<sub>2</sub>(SO<sub>4</sub>)<sub>3</sub>·xH<sub>2</sub>O (16.0 mg, 0.04 mmol), tris(pentafluorophenyl)phosphine (10.6 mg, 0.02 mmol), diglyme (0.4mL) under air at 110 °C for 36 h. The crude mixture was purified by flash column chromatography on silica (petroleum ether/ethyl acetate = 98:2) to provide 28.8 mg, 60% yield of **3ja** as white solid.

<sup>1</sup>H NMR (400 MHz, CDCl<sub>3</sub>, ppm) δ 8.50 (s, 1H), 8.34-8.29 (m, 3H), 7.85 (d, *J* = 8.7 Hz, 1H),

7.65-7.56 (m, 3H);  $^{13}\text{C}$  NMR (100 MHz,  $\text{CDCl}_3$ , ppm)  $\delta$  167.4, 149.9, 147.4, 145.1, 132.9, 129.2, 128.2, 125.9, 120.8, 119.8, 107.2; MS (EI)  $m/z$  (%) 240 (100), 210, 166, 139, 63.

## References

- [1] Z. Duan, S. Ranjit, X. Liu, *Org. Lett.* **2010**, *12*, 2430.
- [2] L. Melzig, A. Metzger, P. Knochel, *Chem. Eur. J.* **2011**, *17*, 2948.
- [3] J. Huang, J. Chan, Y. Chen, C. Borths, K. Baucom, R. Larsen, M. Faul, *J. Am. Chem. Soc.* **2010**, *132*, 3674.
- [4] C. Mukhopadhyay, A. Datta, *J. Heterocyclic Chem.* **2009**, *46*, 91.
- [5] T. Yamamoto, K. Muto, J. Canivet, J. Yamaguchi, K. Itami, M. Komiyama, *Chem. Eur. J.* **2011**, *17*, 10113.
- [6] D. Ma, P. Xue, Y. Jiang, S. Xie, X. Zhang, J. Dong, *Angew. Chem. Int. Ed.* **2009**, *48*, 4222.
- [7] M. Lahlou, M. Weliou, M. Salem, M. S. Hajji, *Ann. Pharm. Franc.* **2003**, *61*, 57.
- [8] D. Prasad, G. Sekar, *Org. Lett.* **2011**, *13*, 1008.
- [9] K. Inamoto, C. Hasegawa, K. Hiroya, T. Doi, *Org. Lett.* **2008**, *10*, 5147.
- [10] K. Osowska, O. Miljanic, *J. Am. Chem. Soc.* **2011**, *133*, 724.
- [11] C. So, P. Chak, F. Kwong, *Chem. Eur. J.* **2011**, *17*, 761.
- [12] J. Peng, C. Zong, M. Ye, T. Chen, D. Gao, Y. Wang, C. Chen, *Org. Biomol. Chem.* **2011**, *9*, 1225.
- [13] H. Hachiya, K. Hirano, T. Satoh, M. Miura, *Angew. Chem. Int. Ed.* **2010**, *49*, 2202.
- [14] G. Wynne, S. Wren, et al., Patent, WO2007091106.

<sup>1</sup>H and <sup>13</sup>C NMR spectra

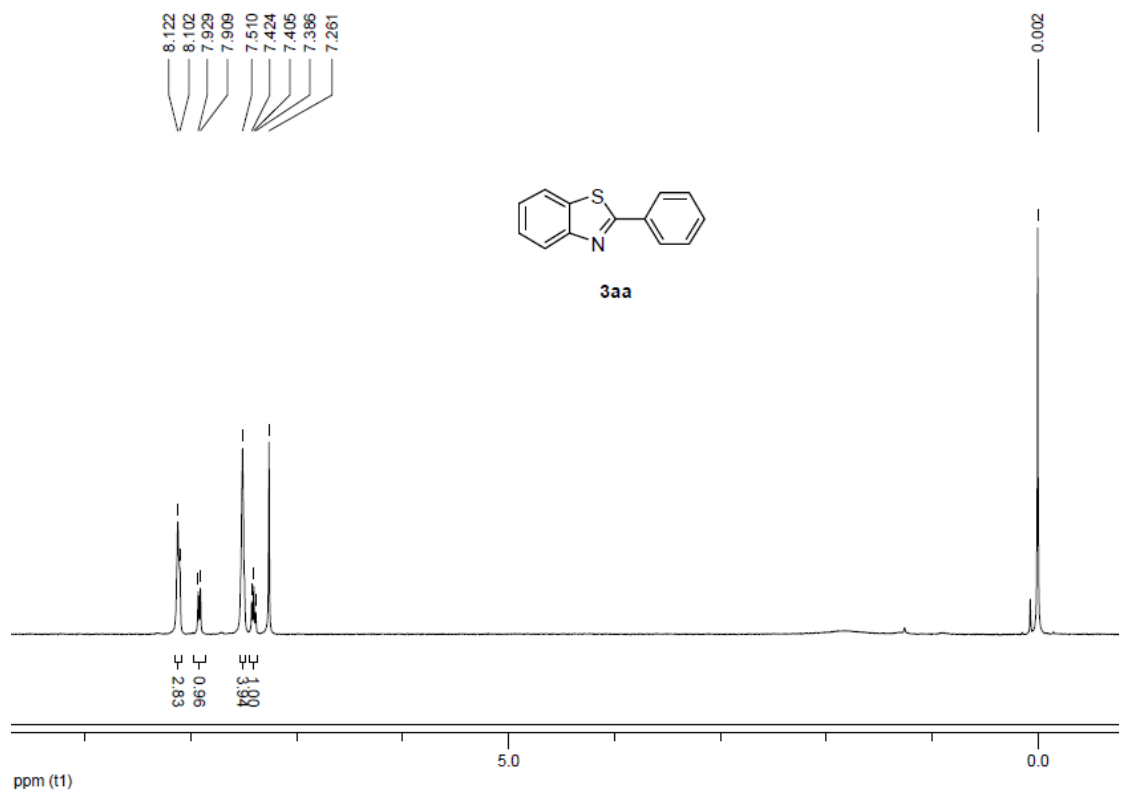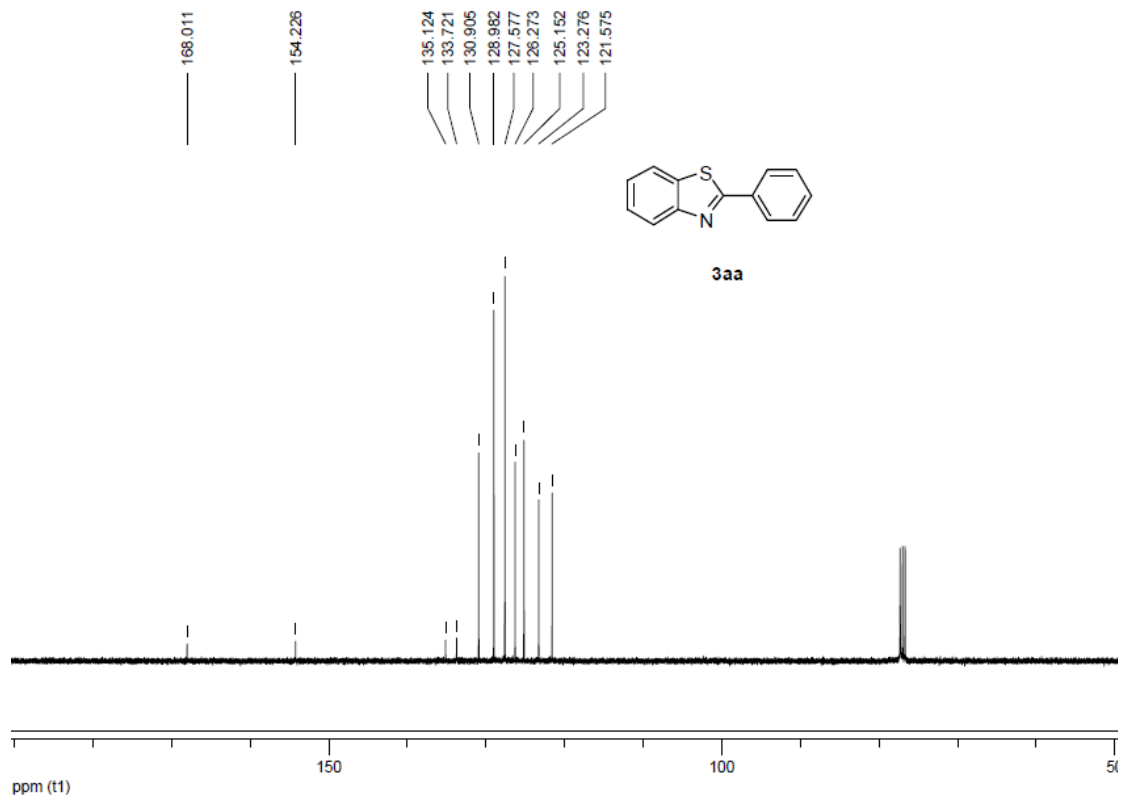

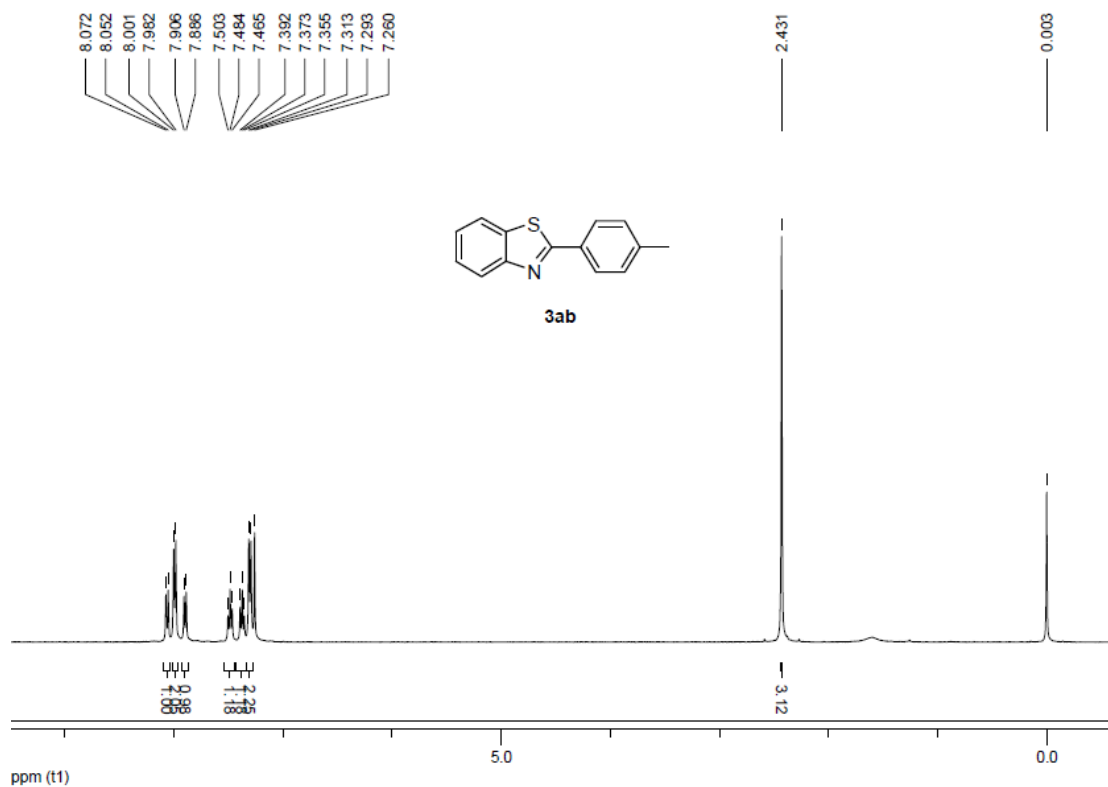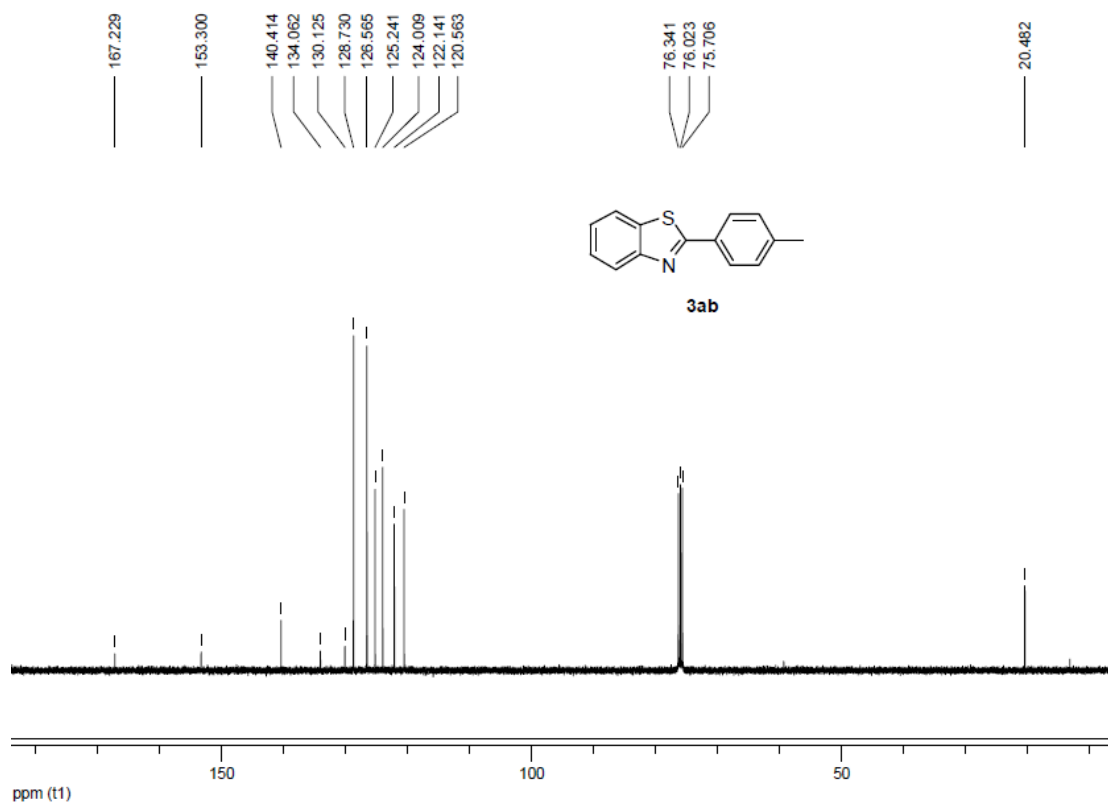



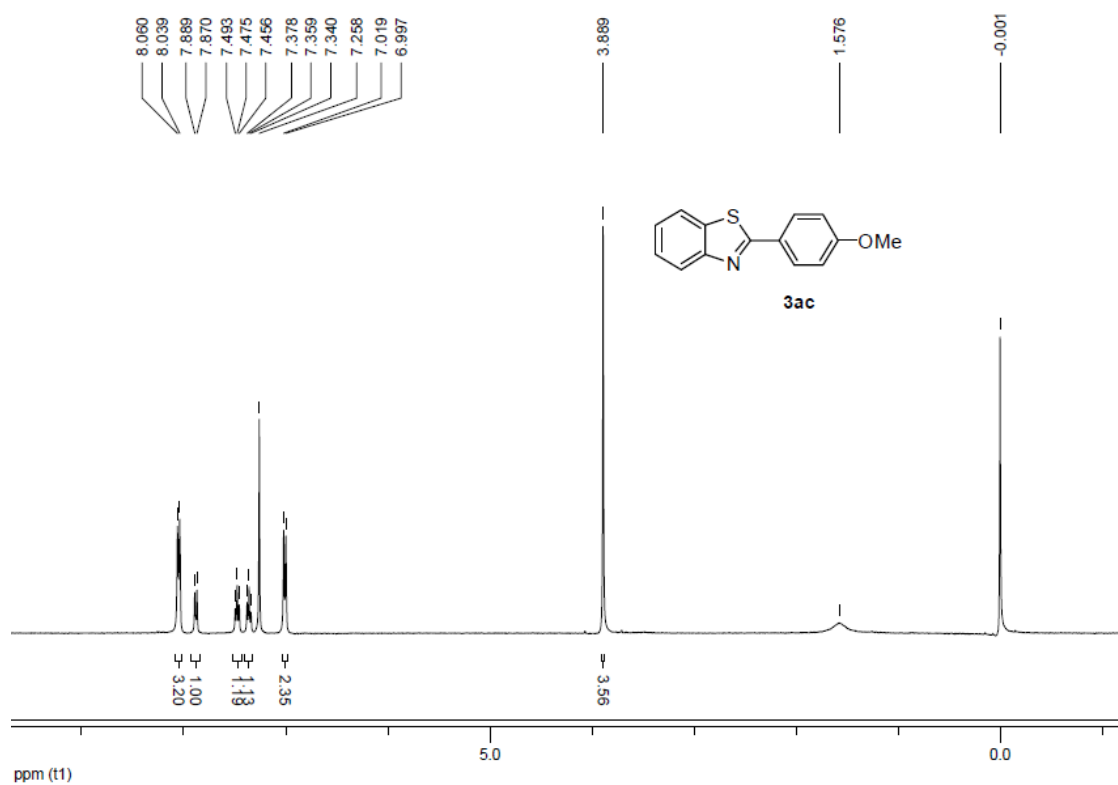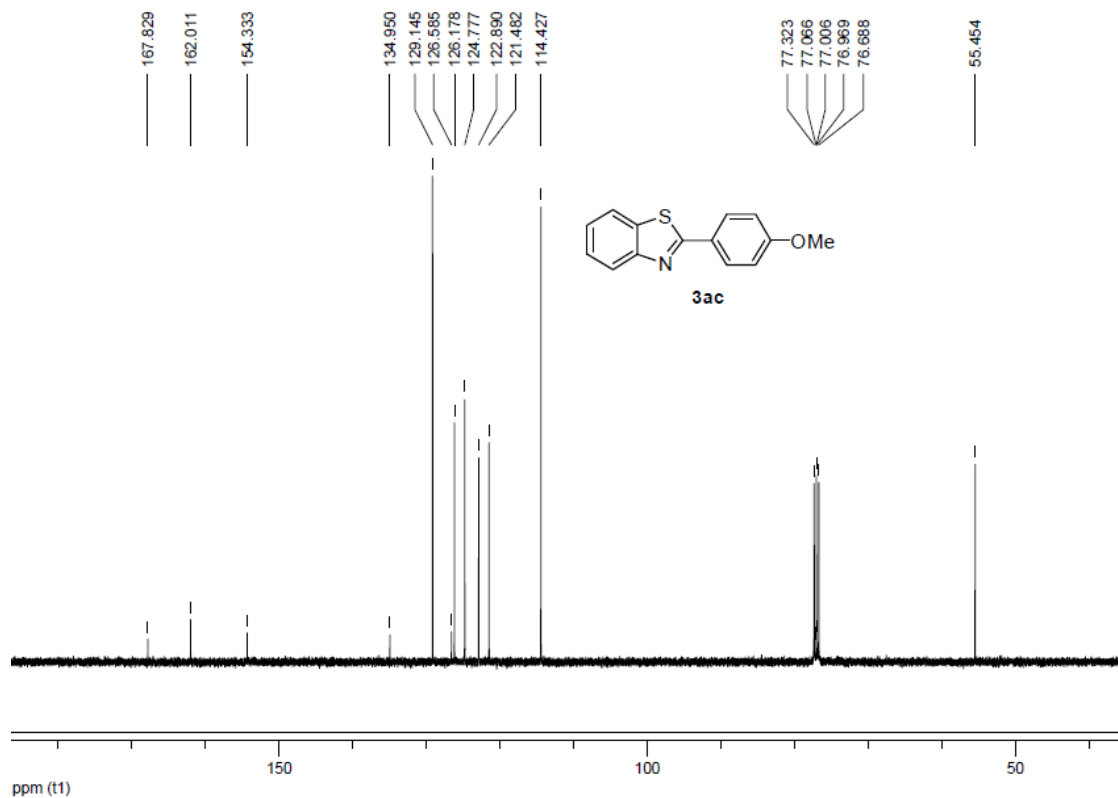

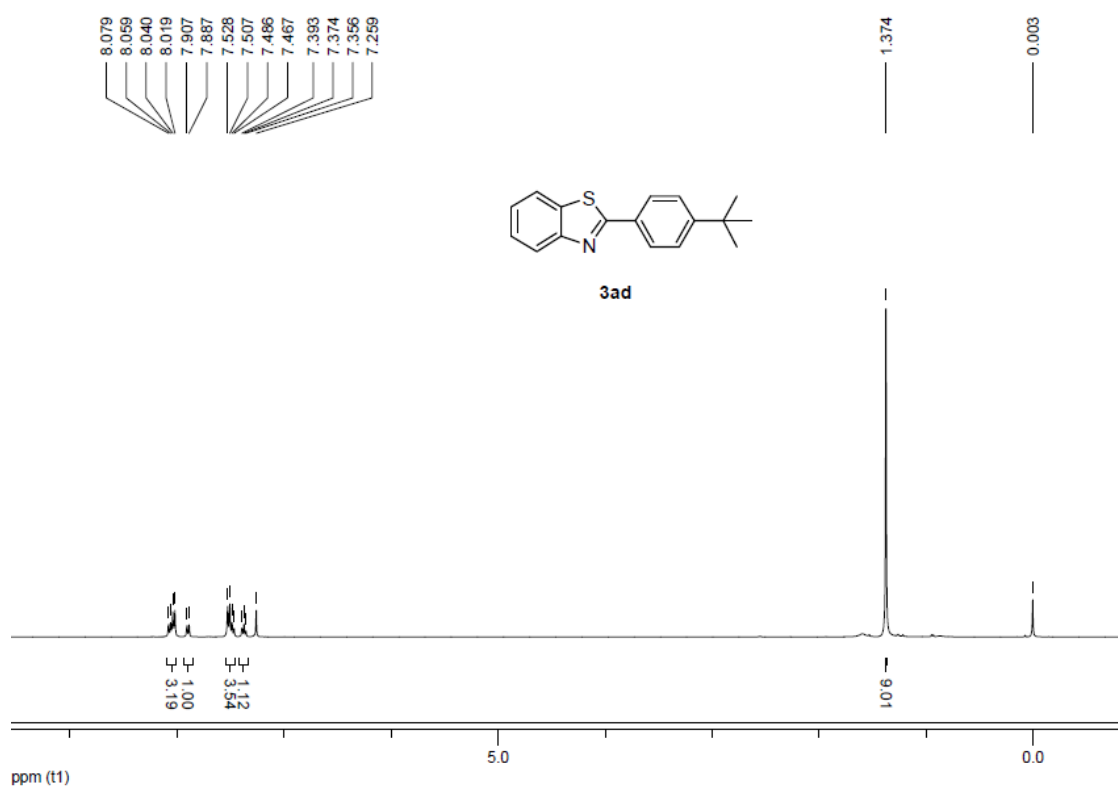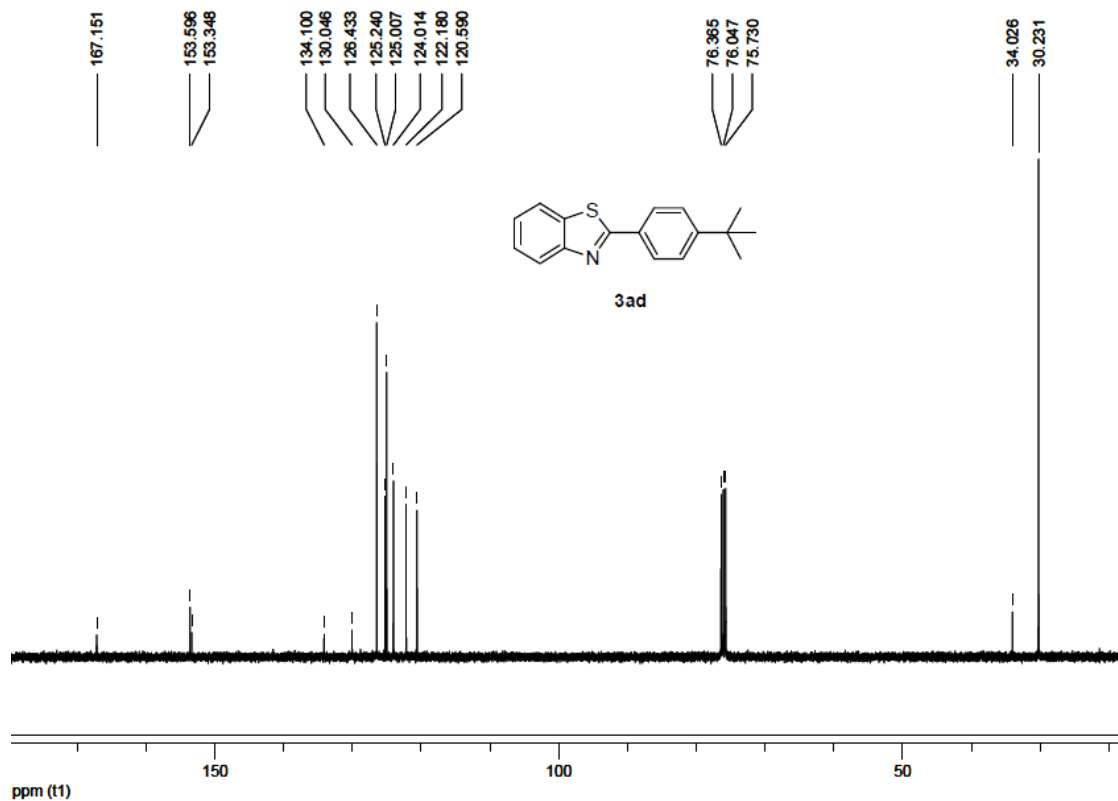

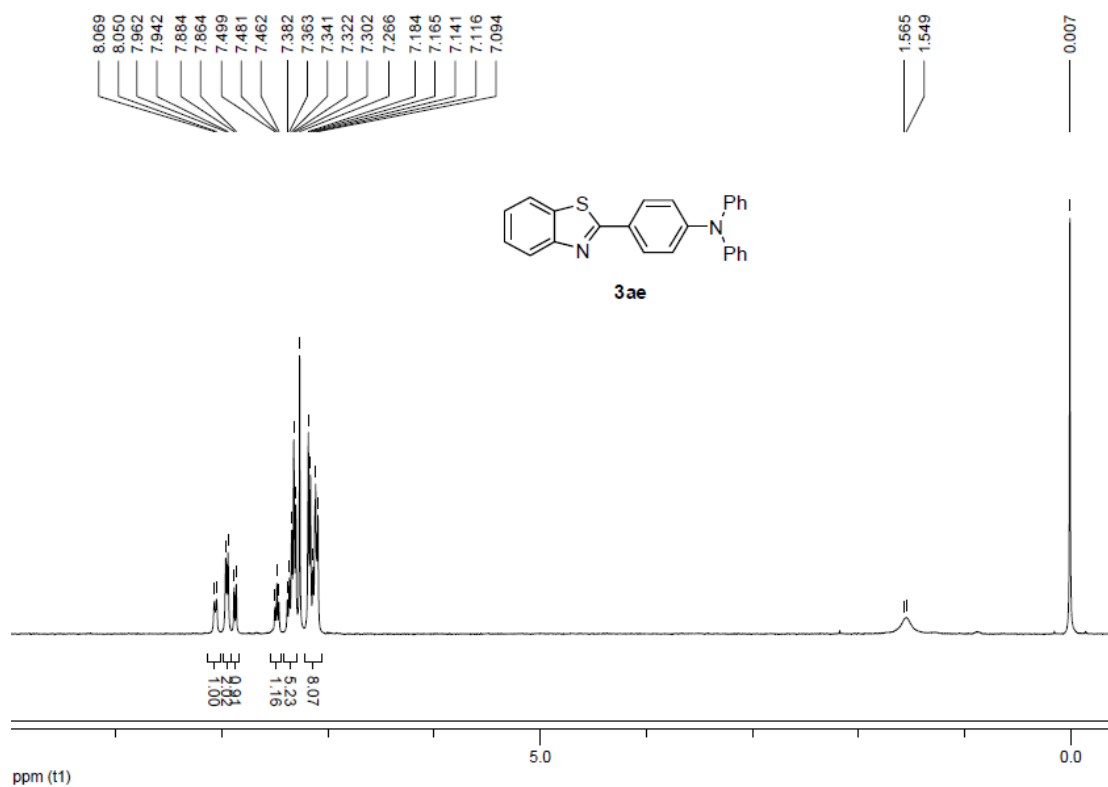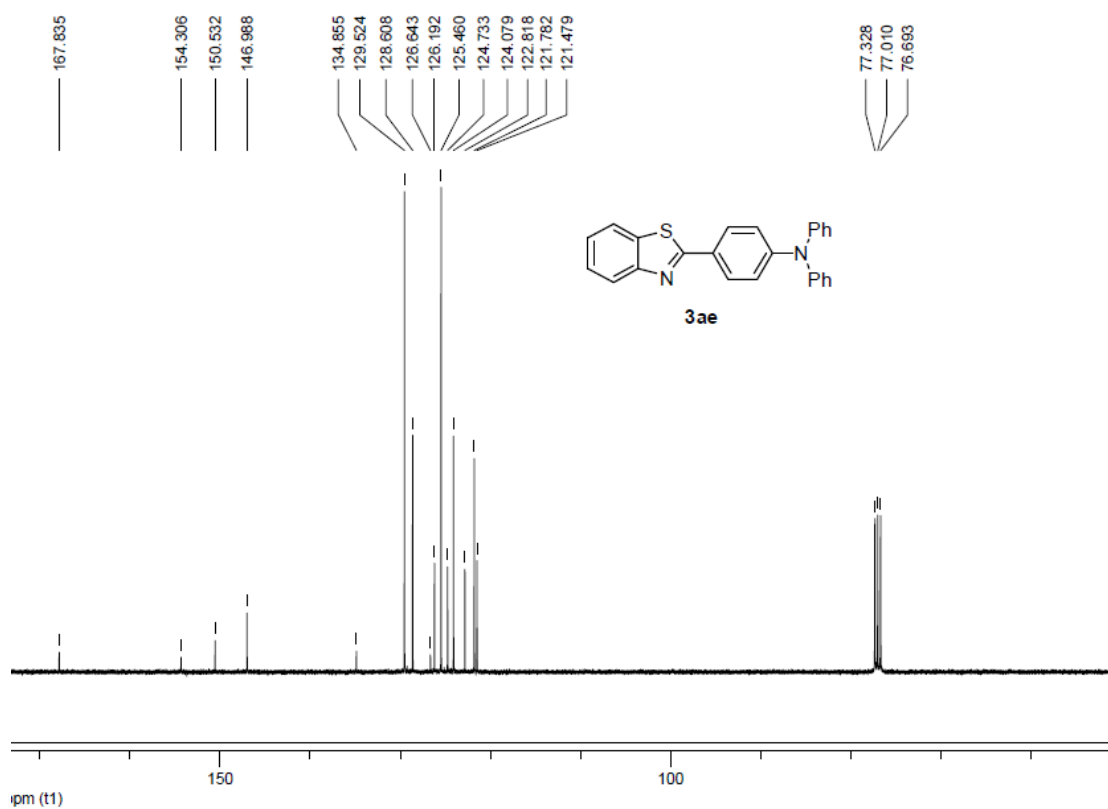

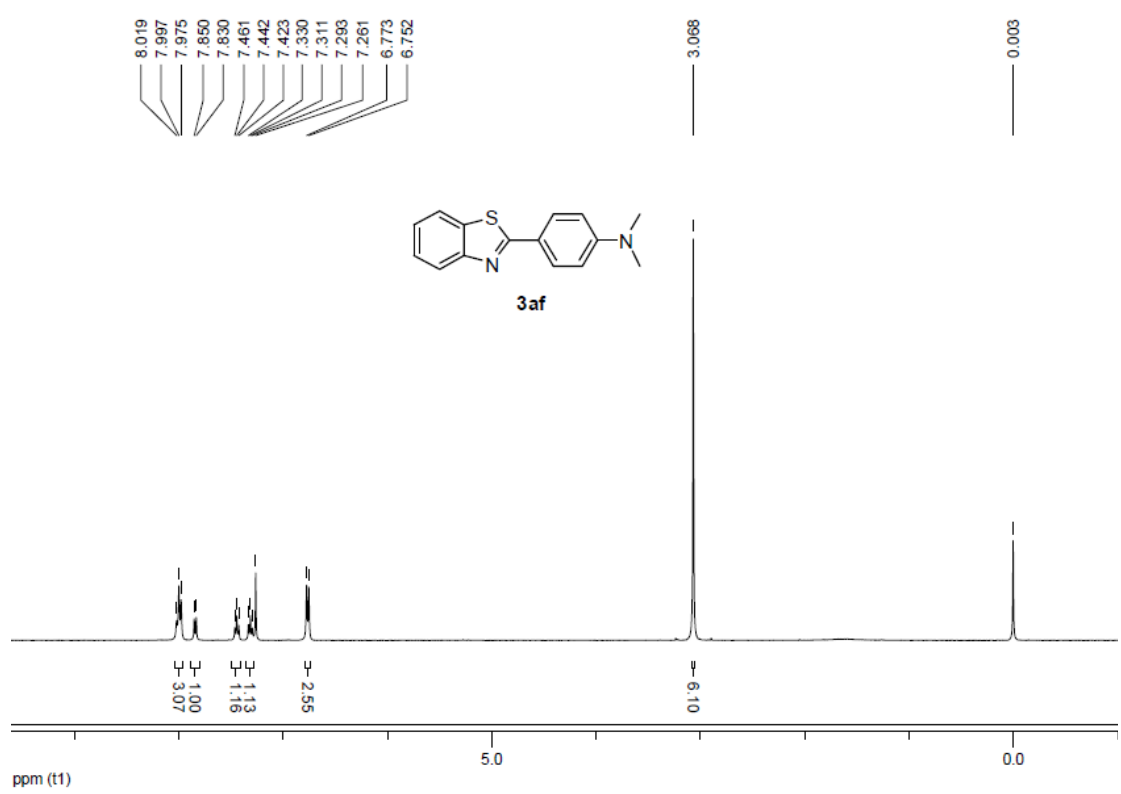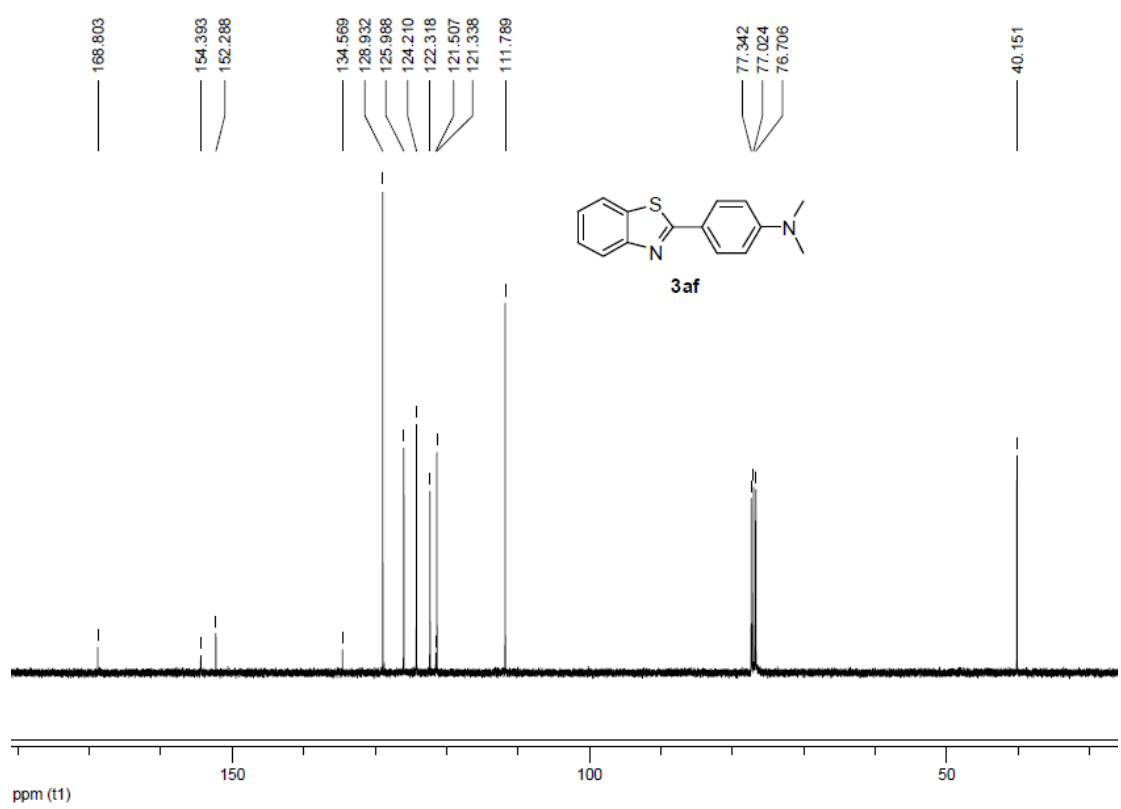

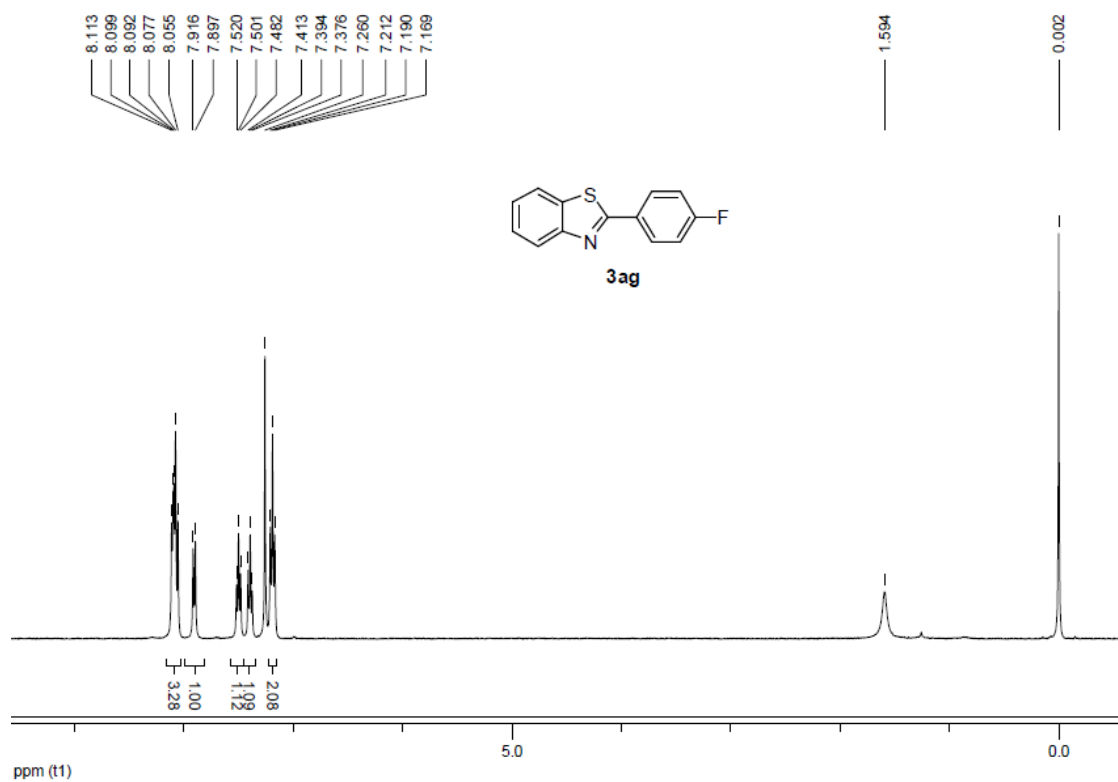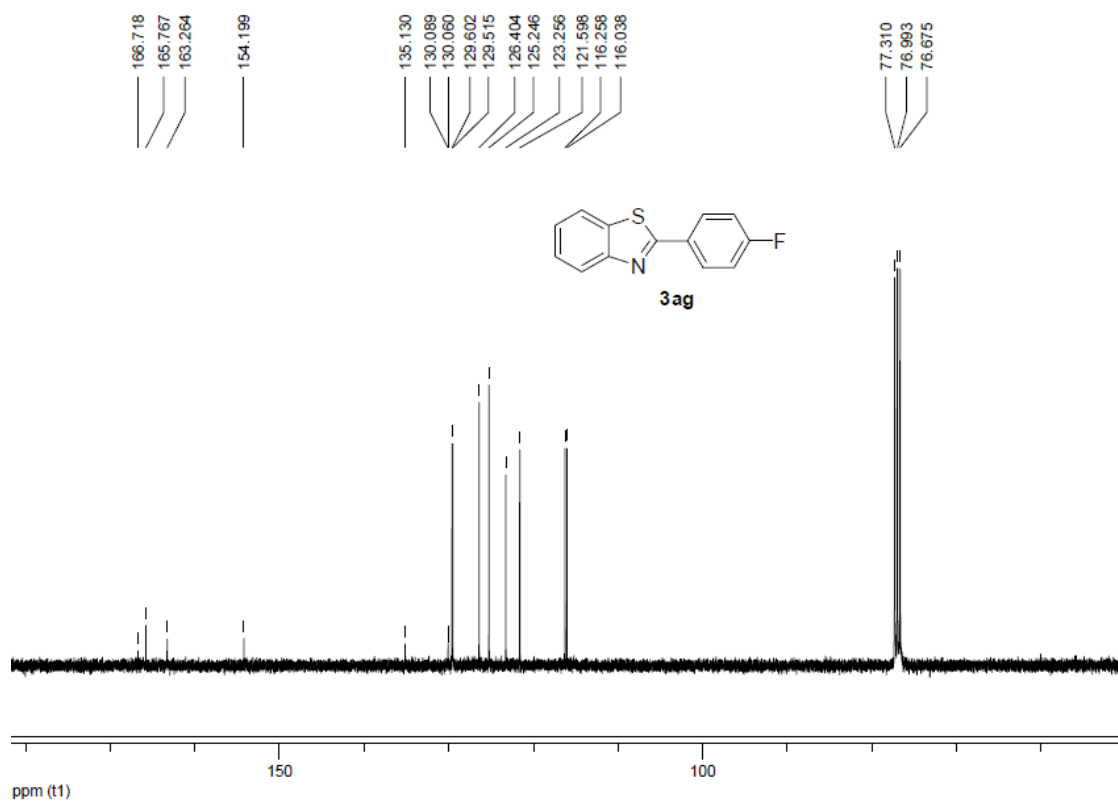

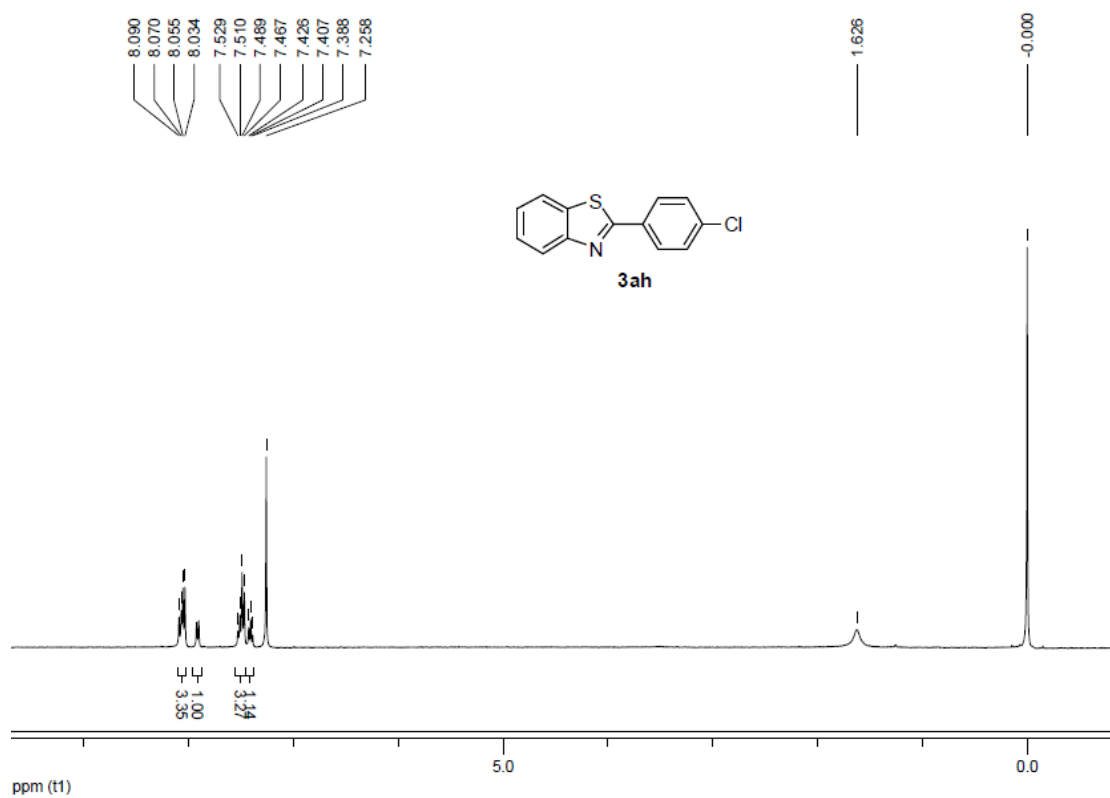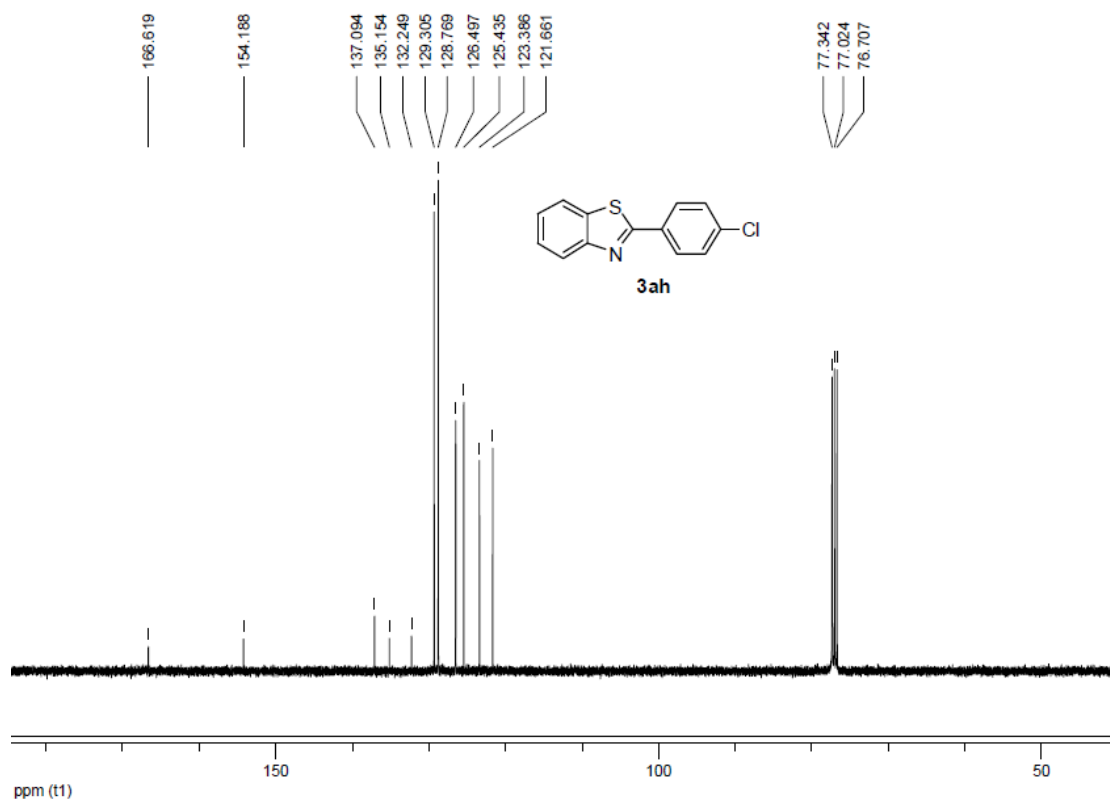



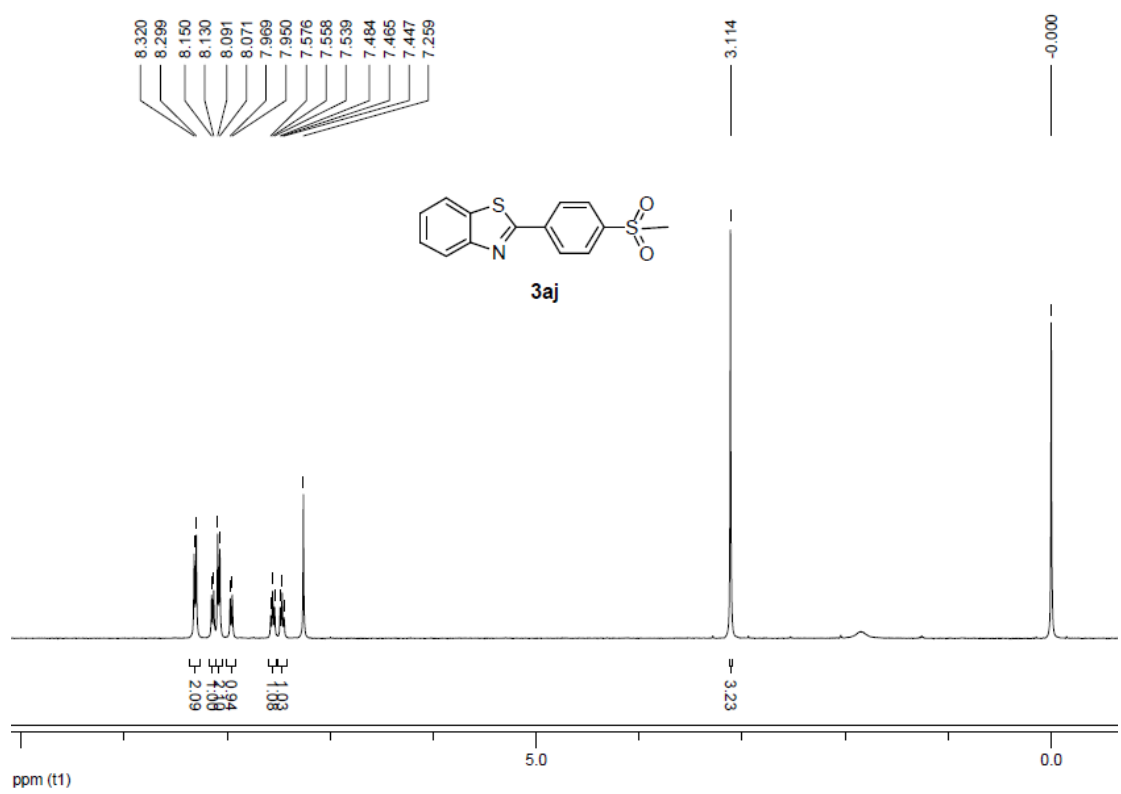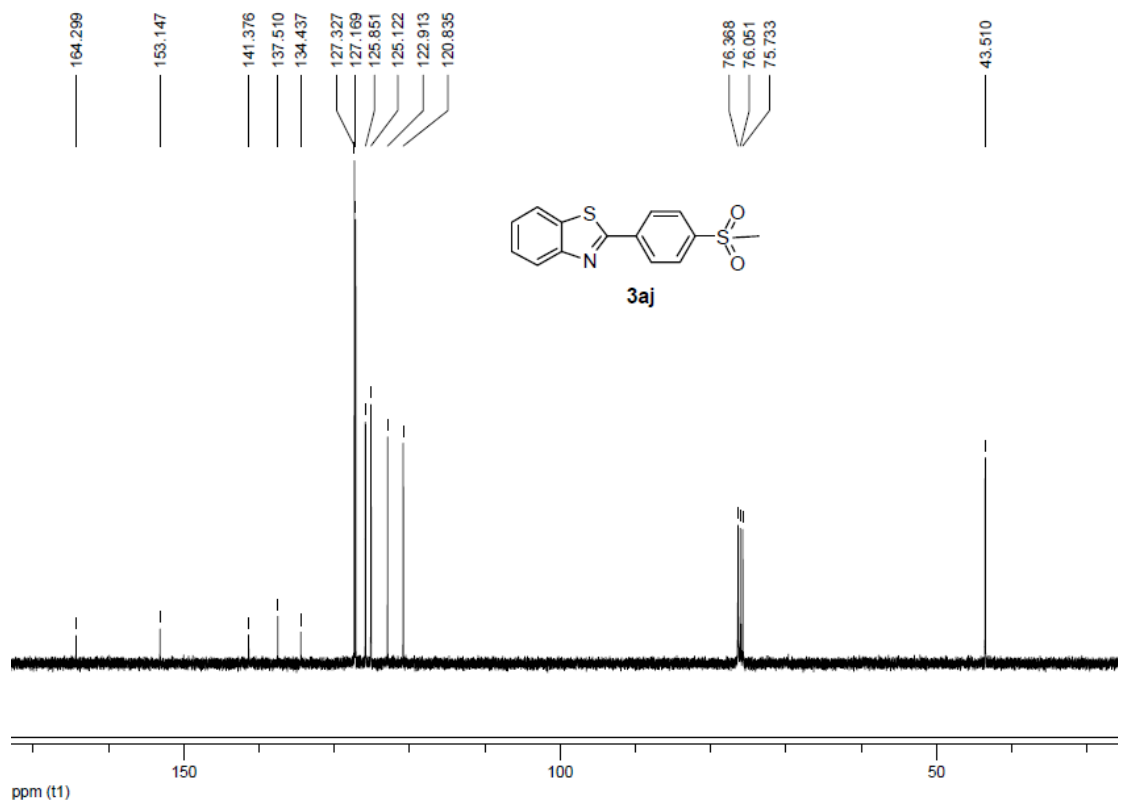



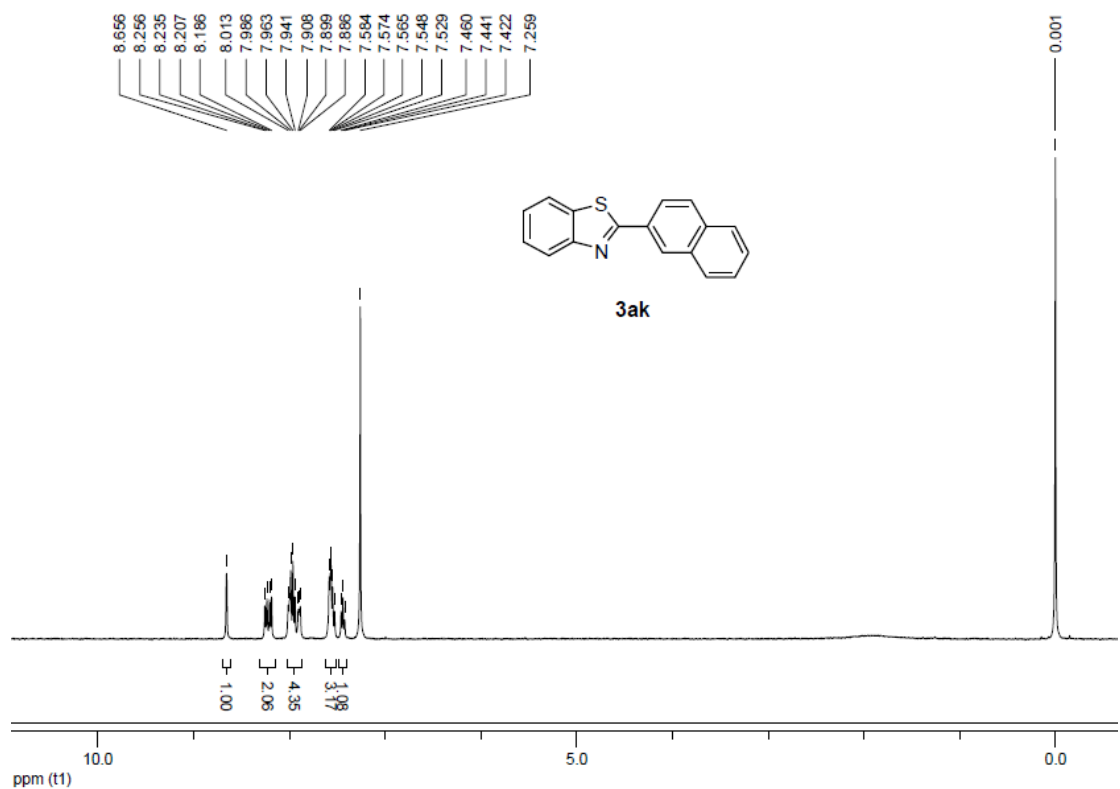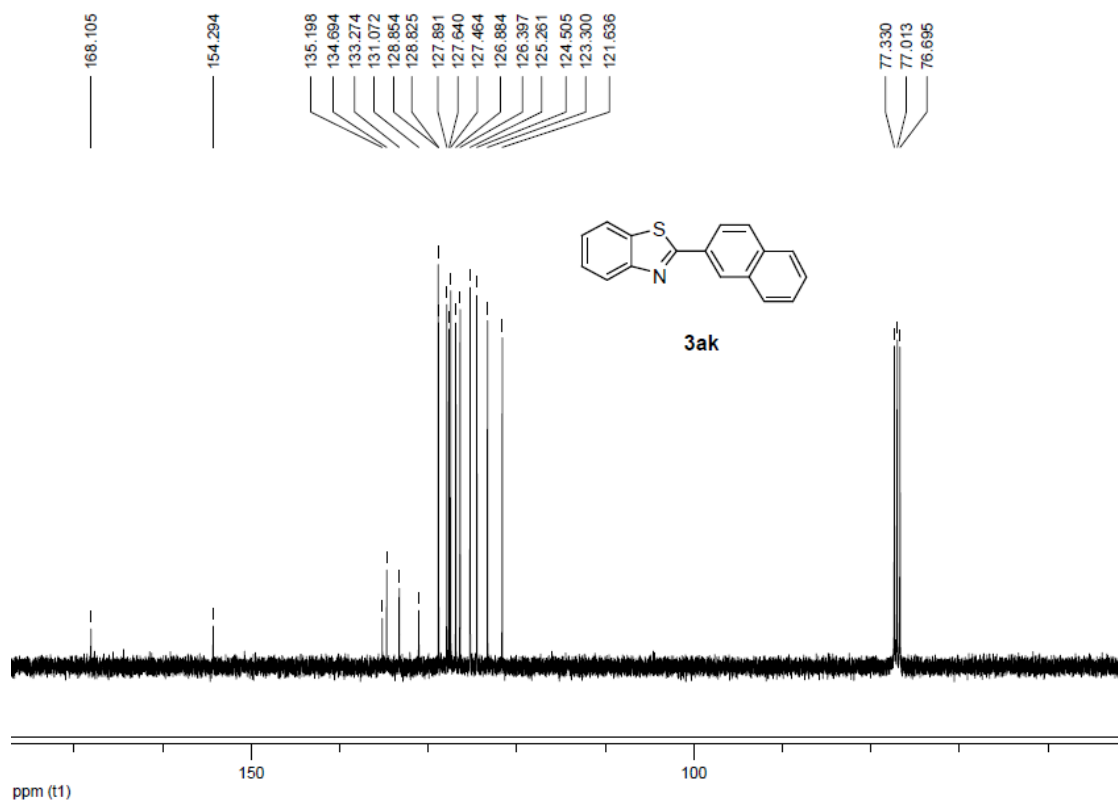

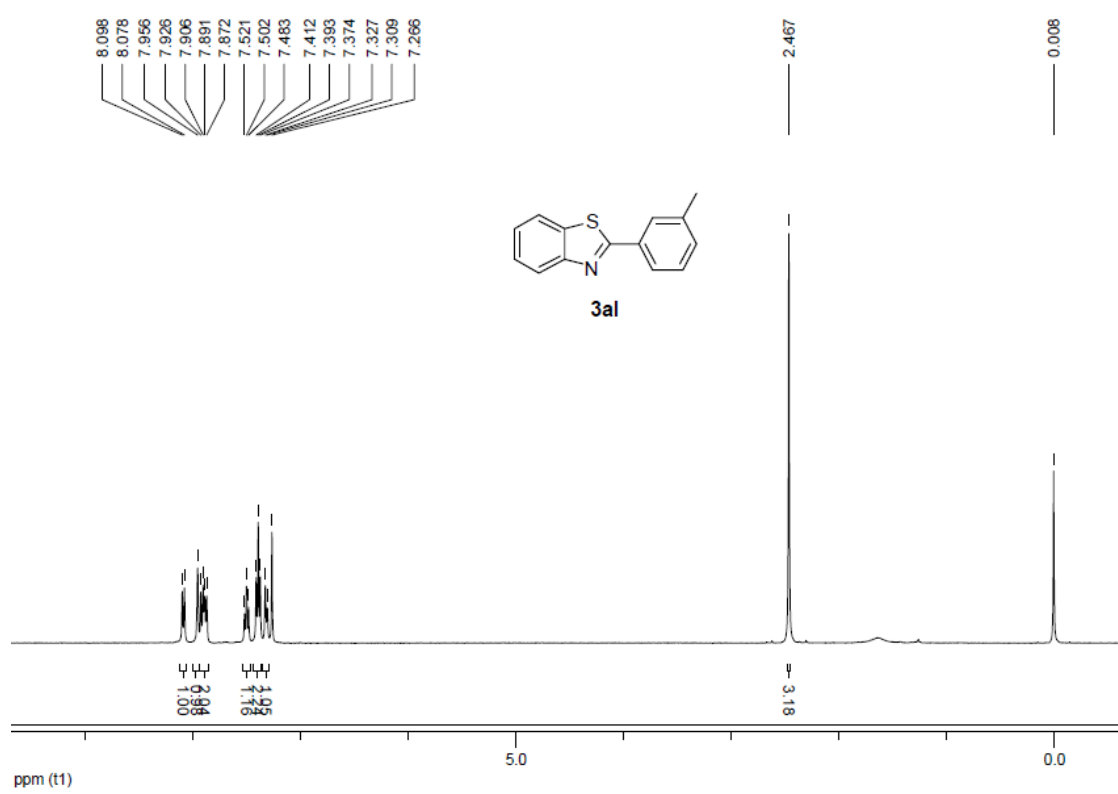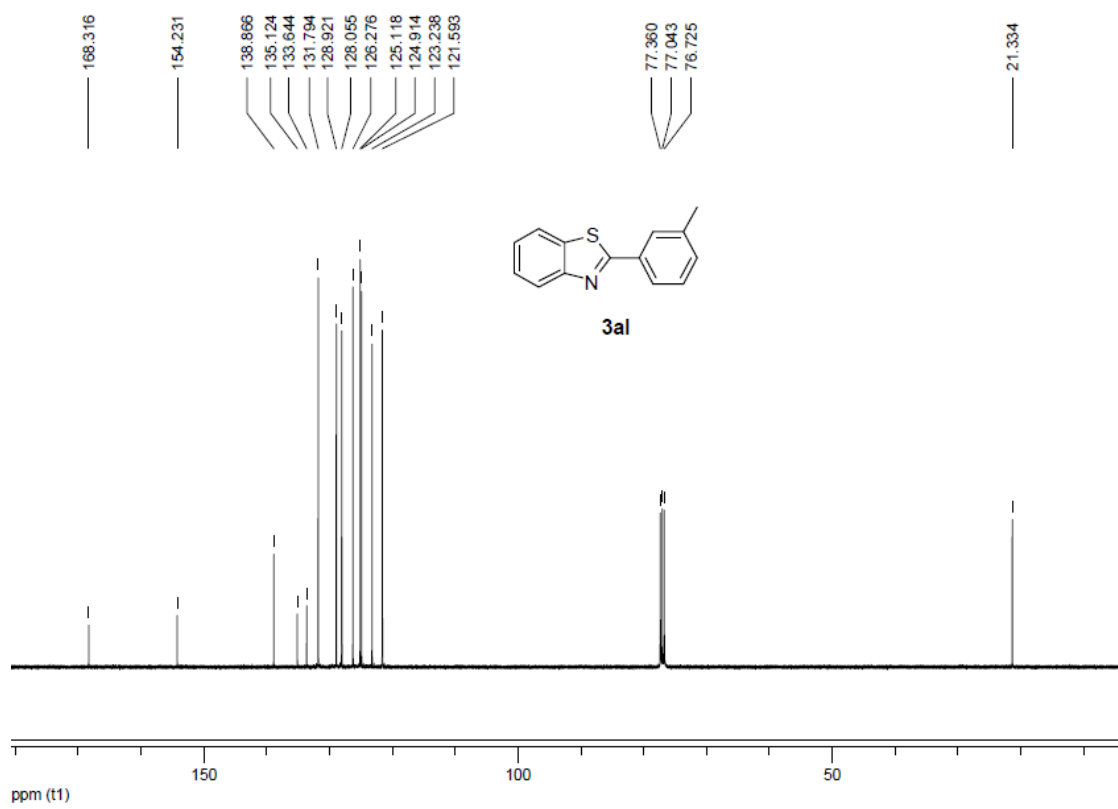

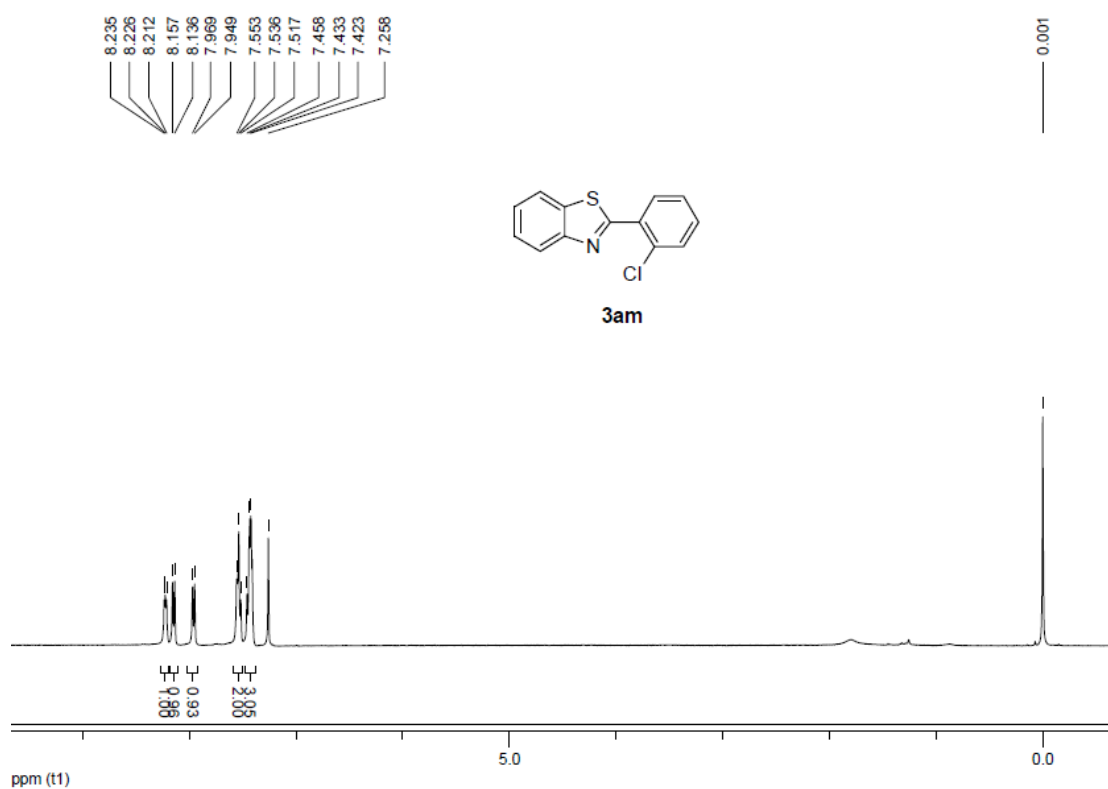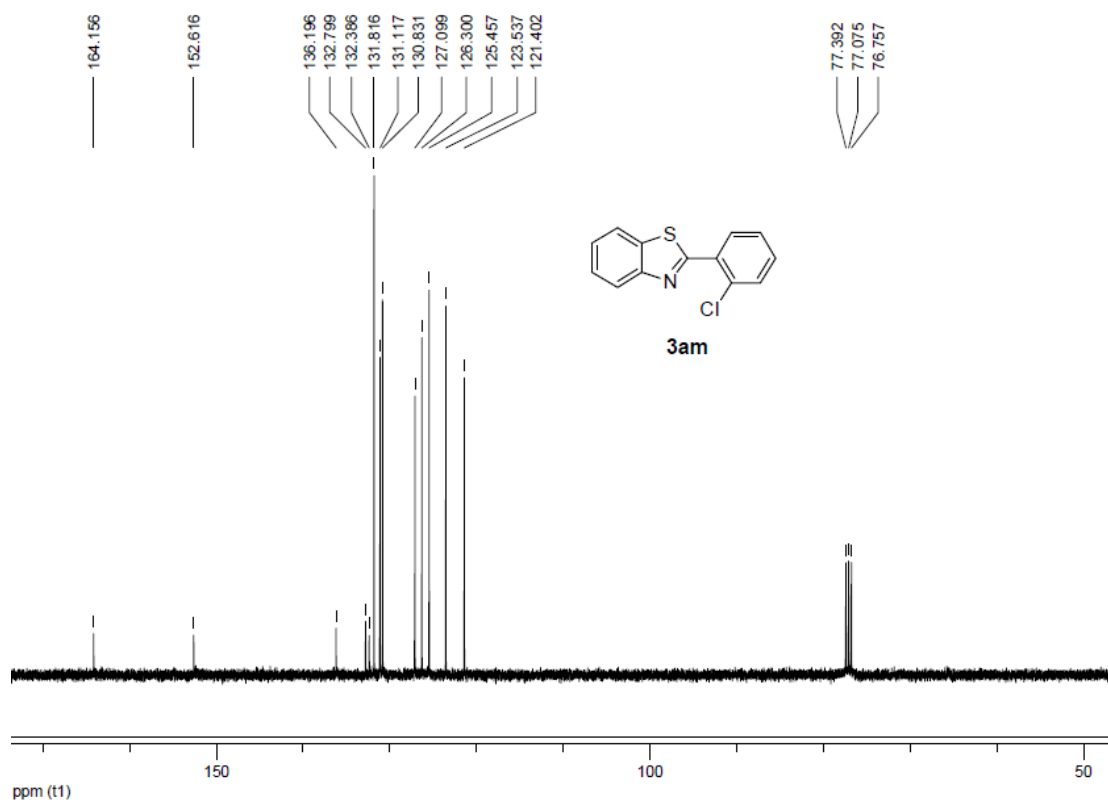

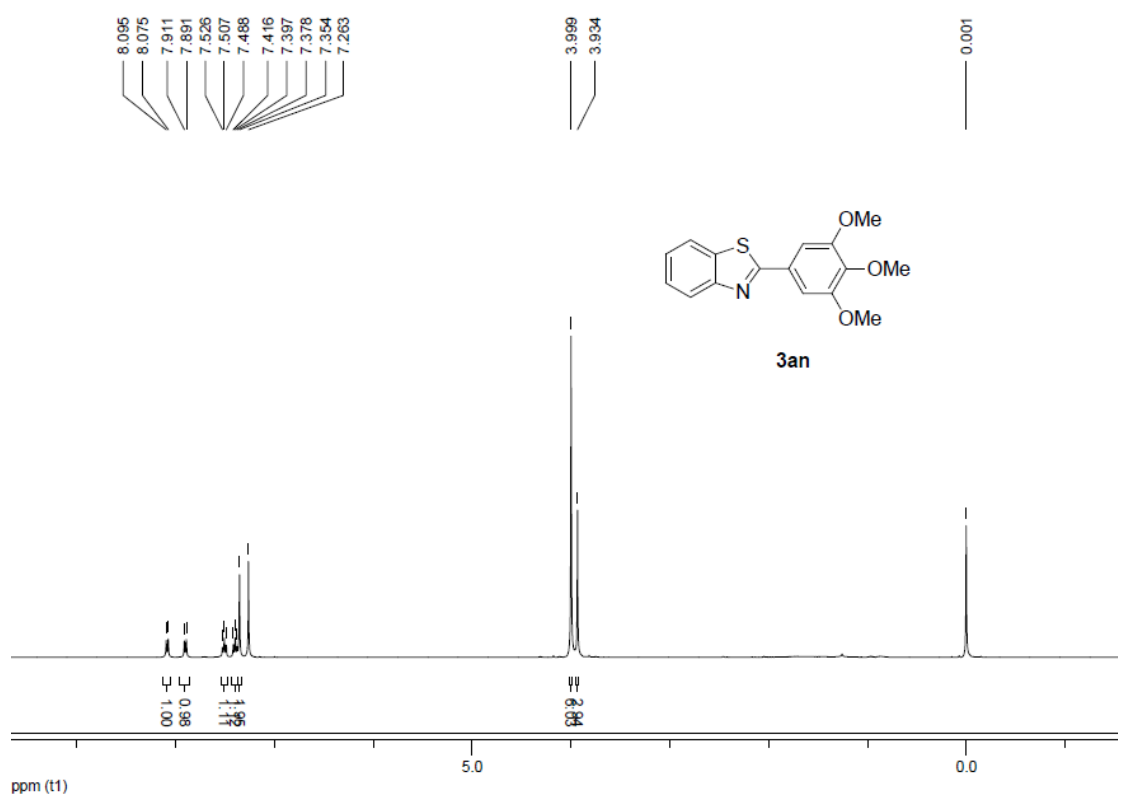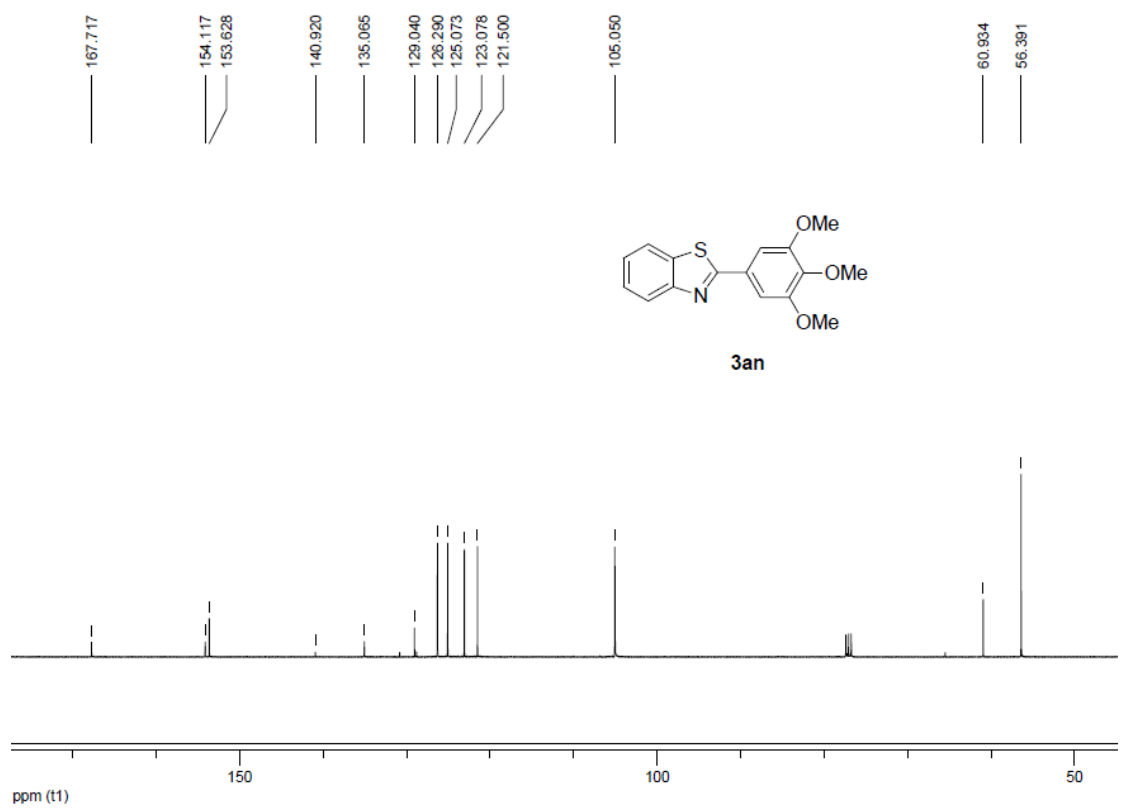

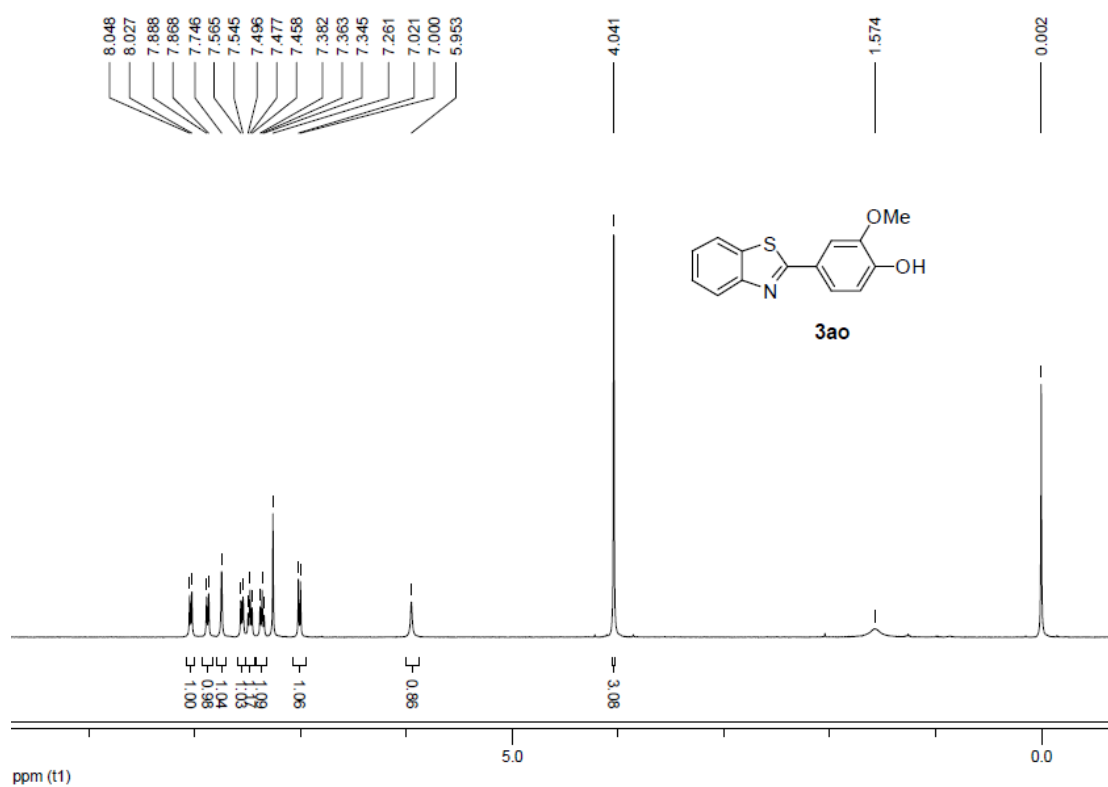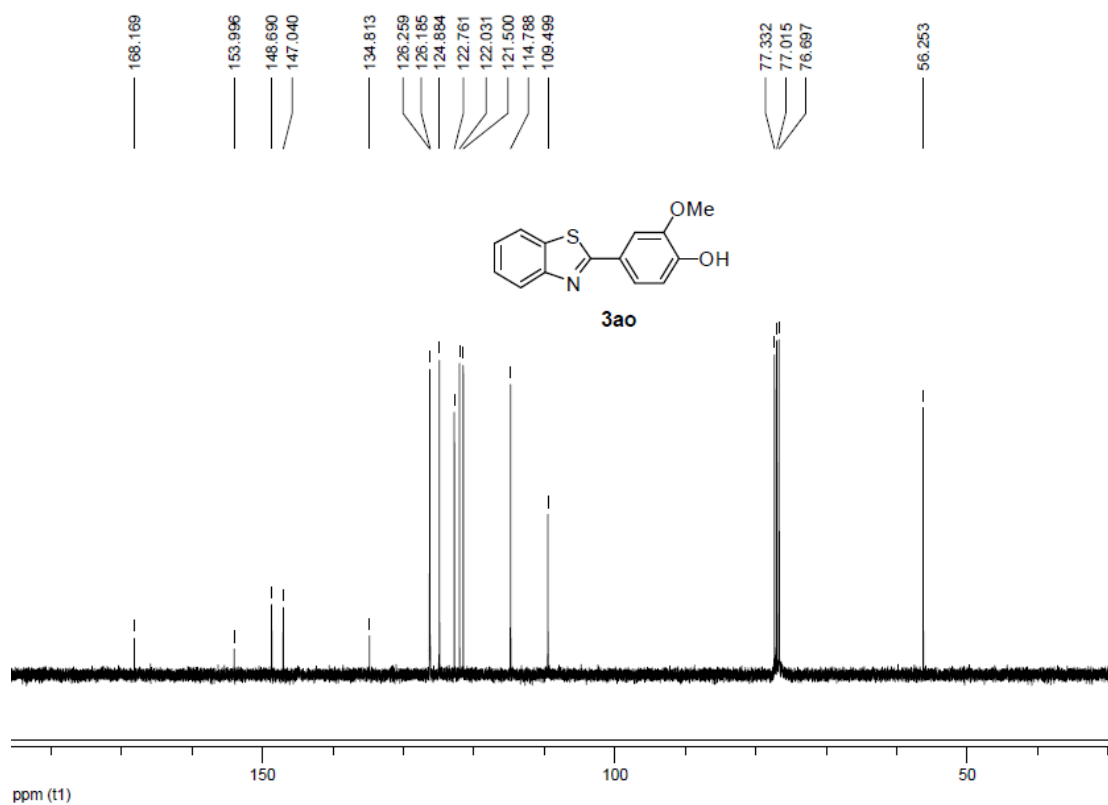





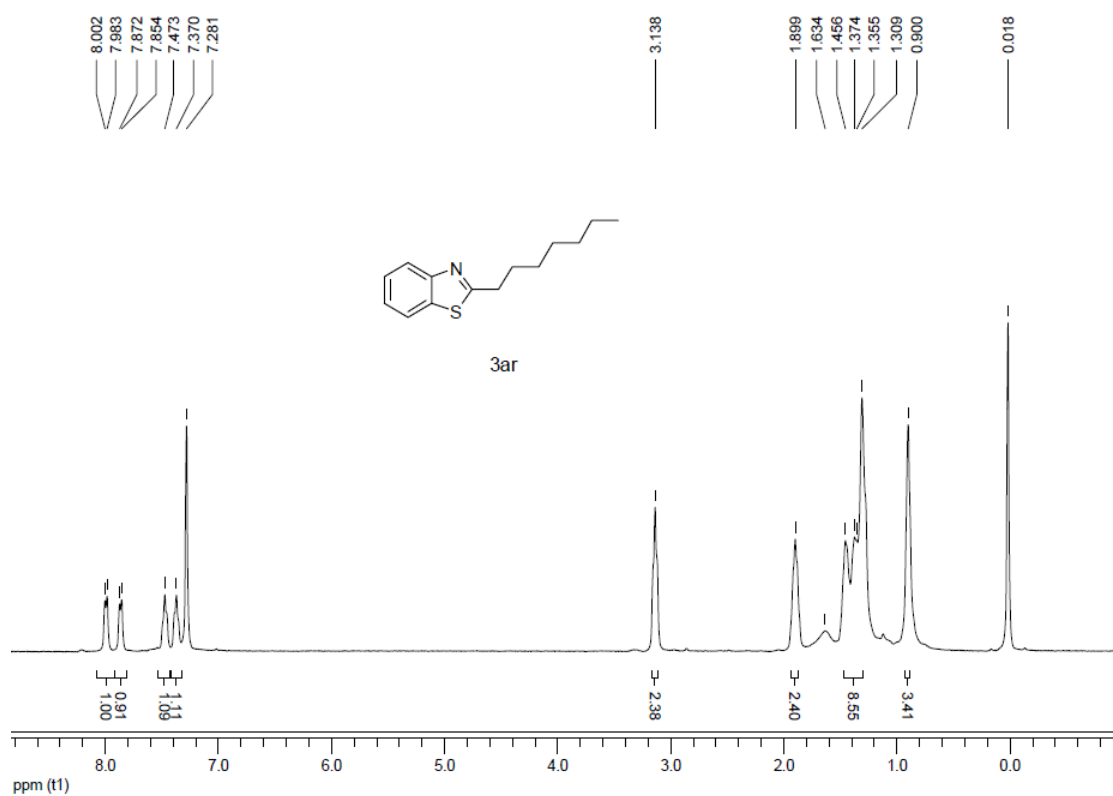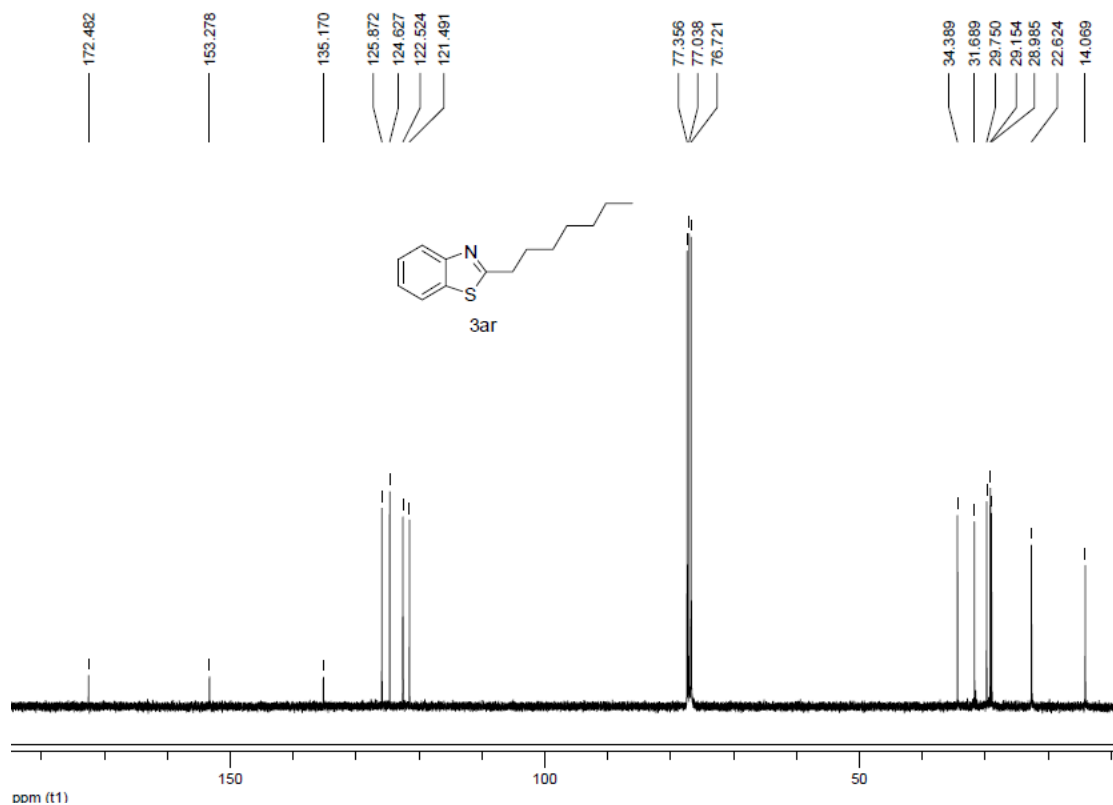



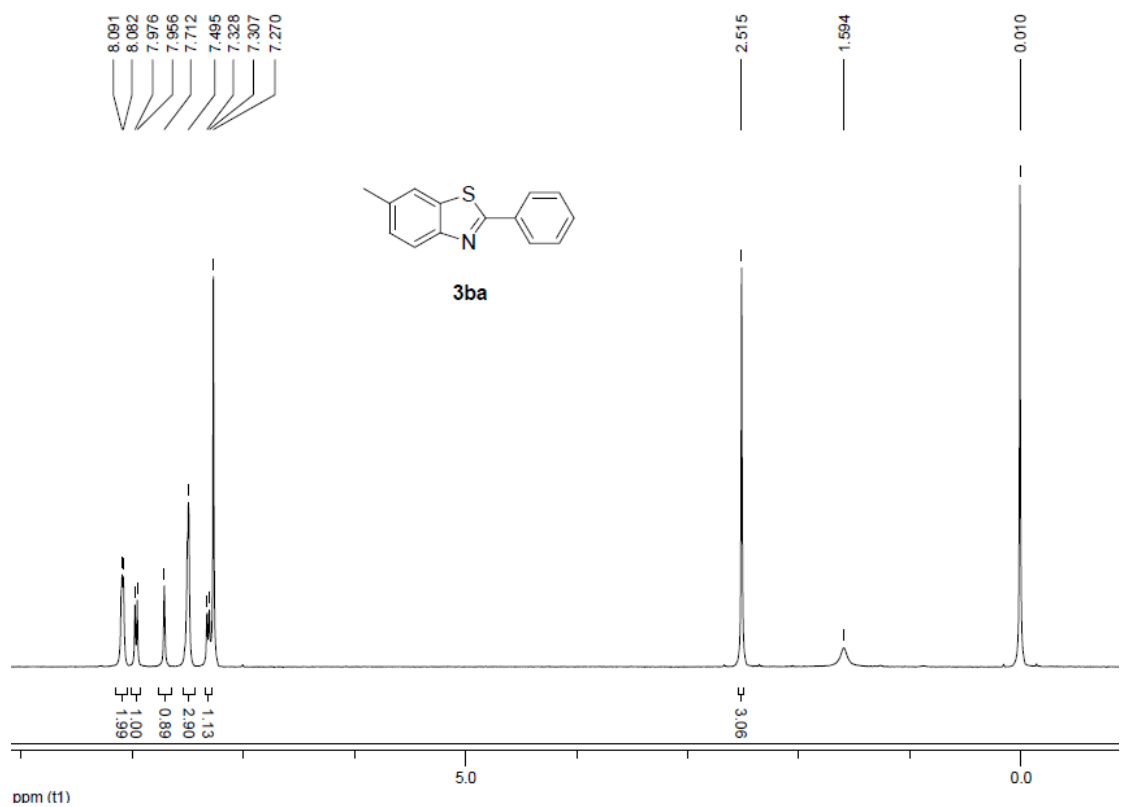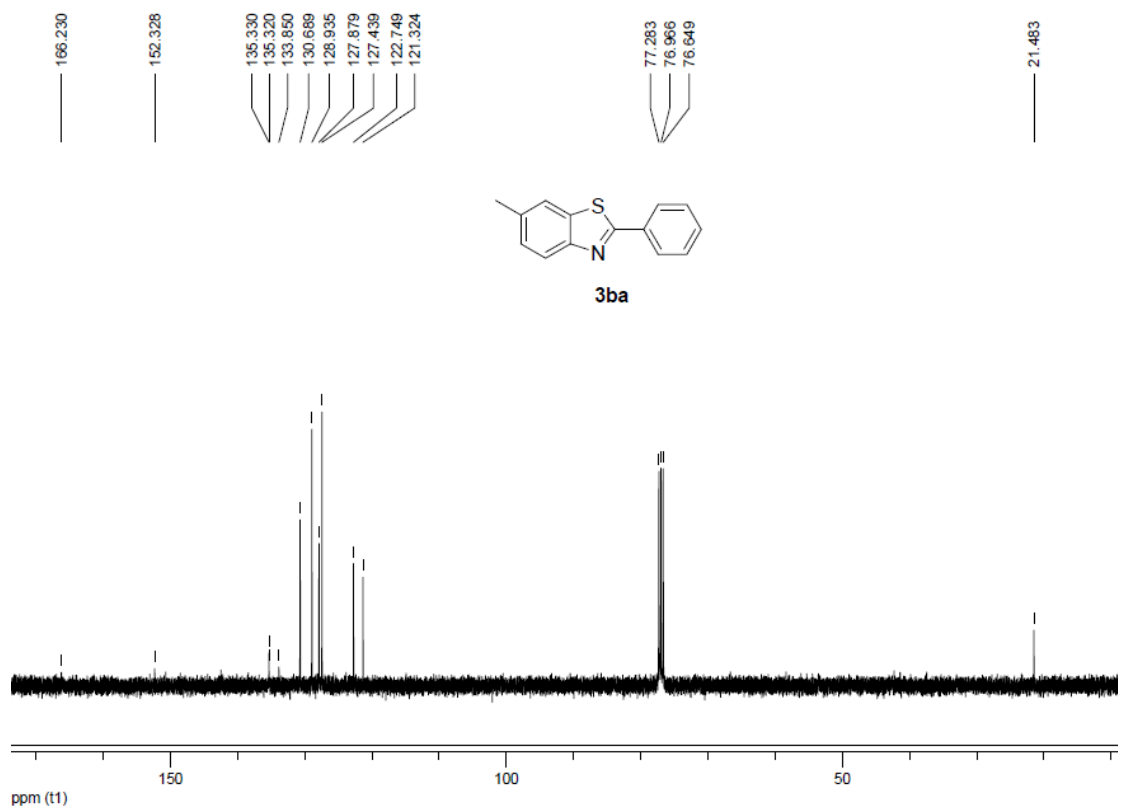

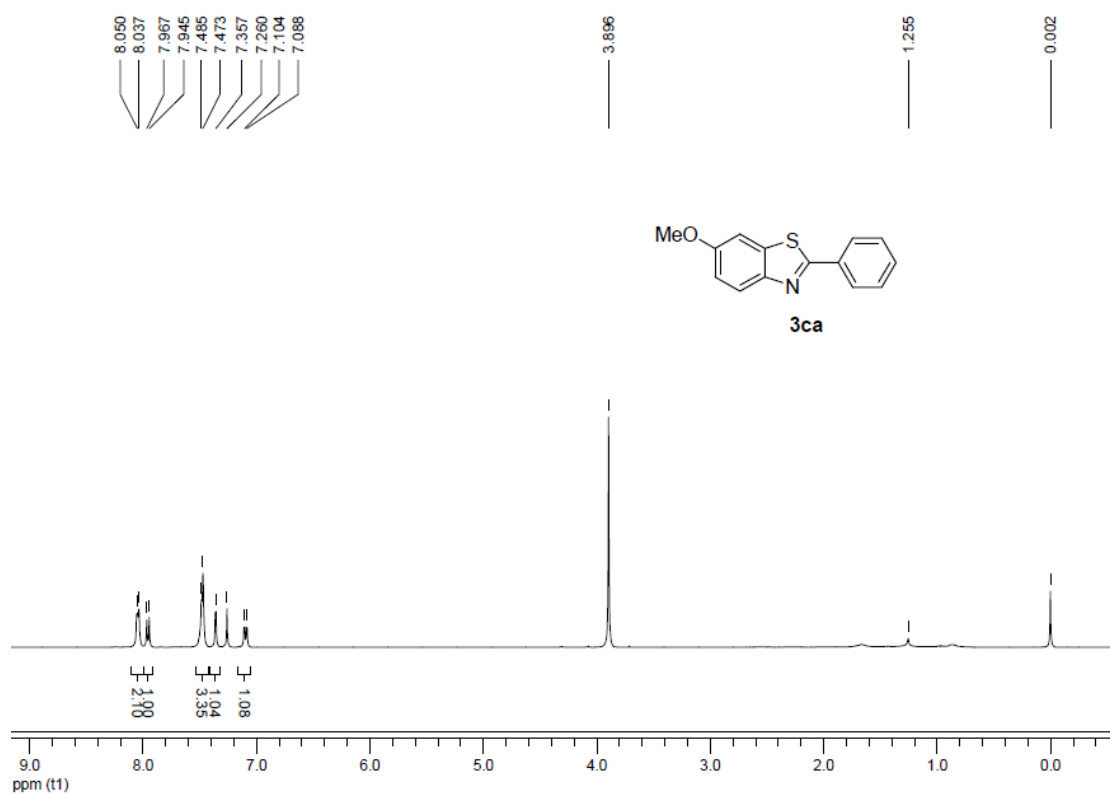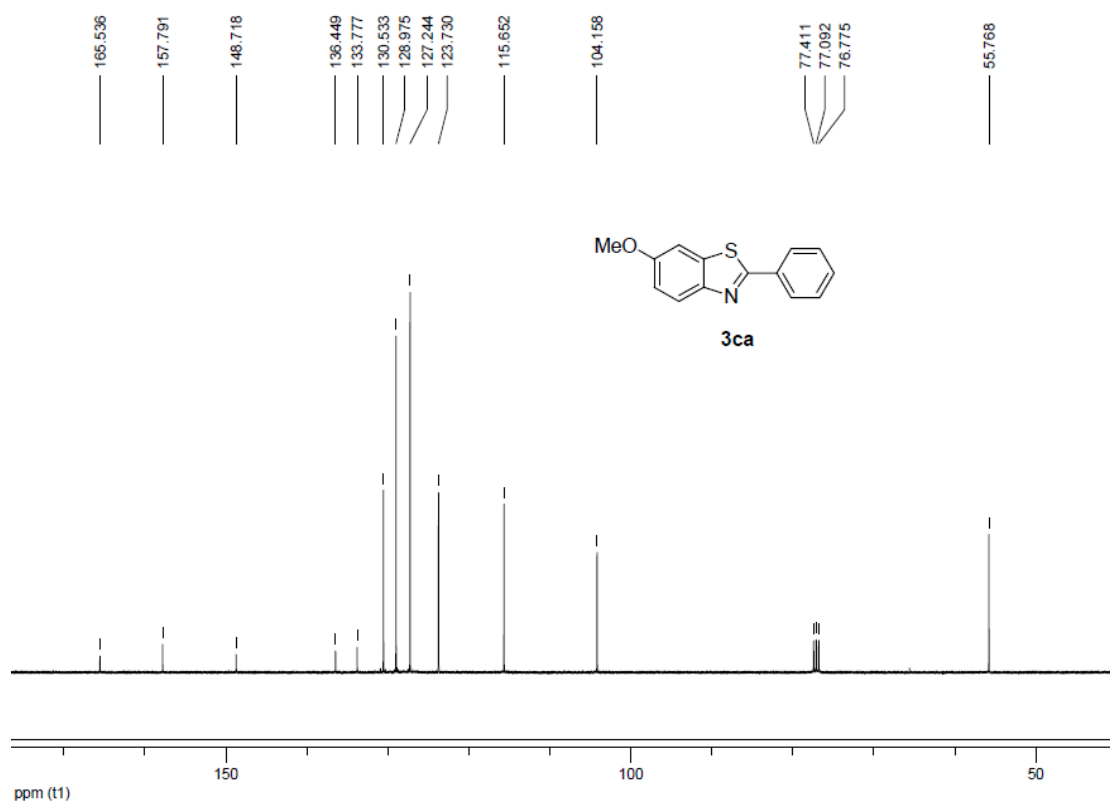

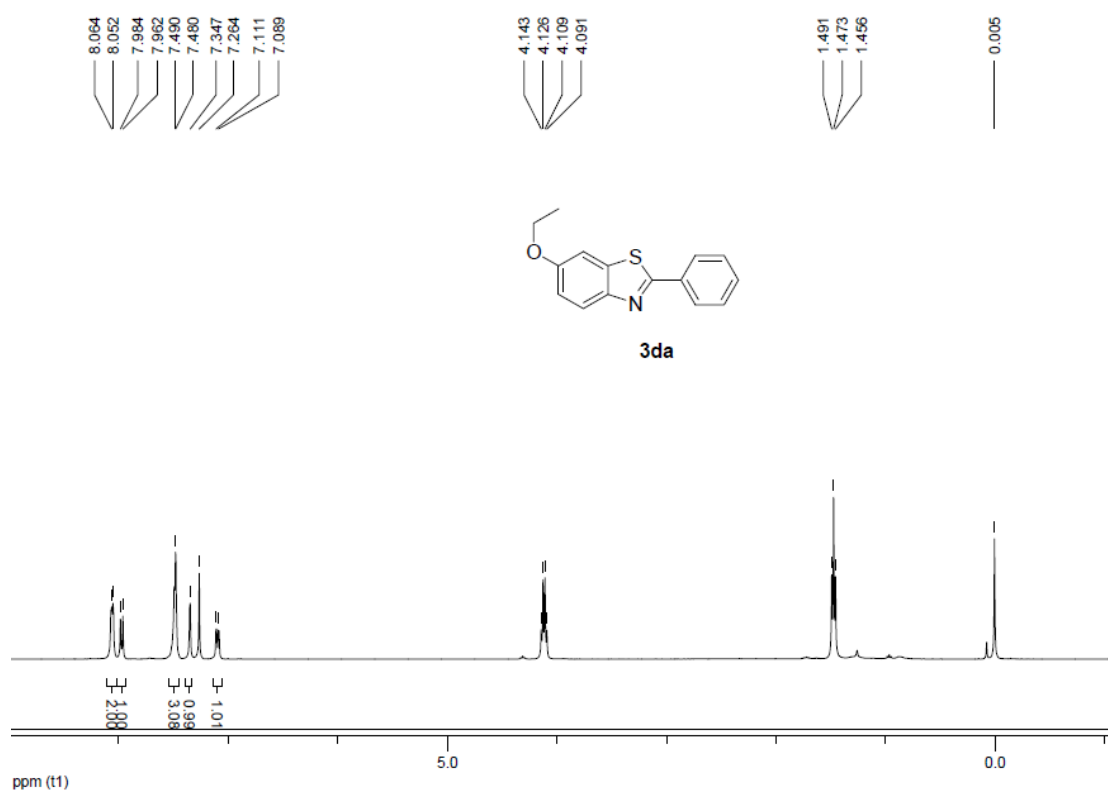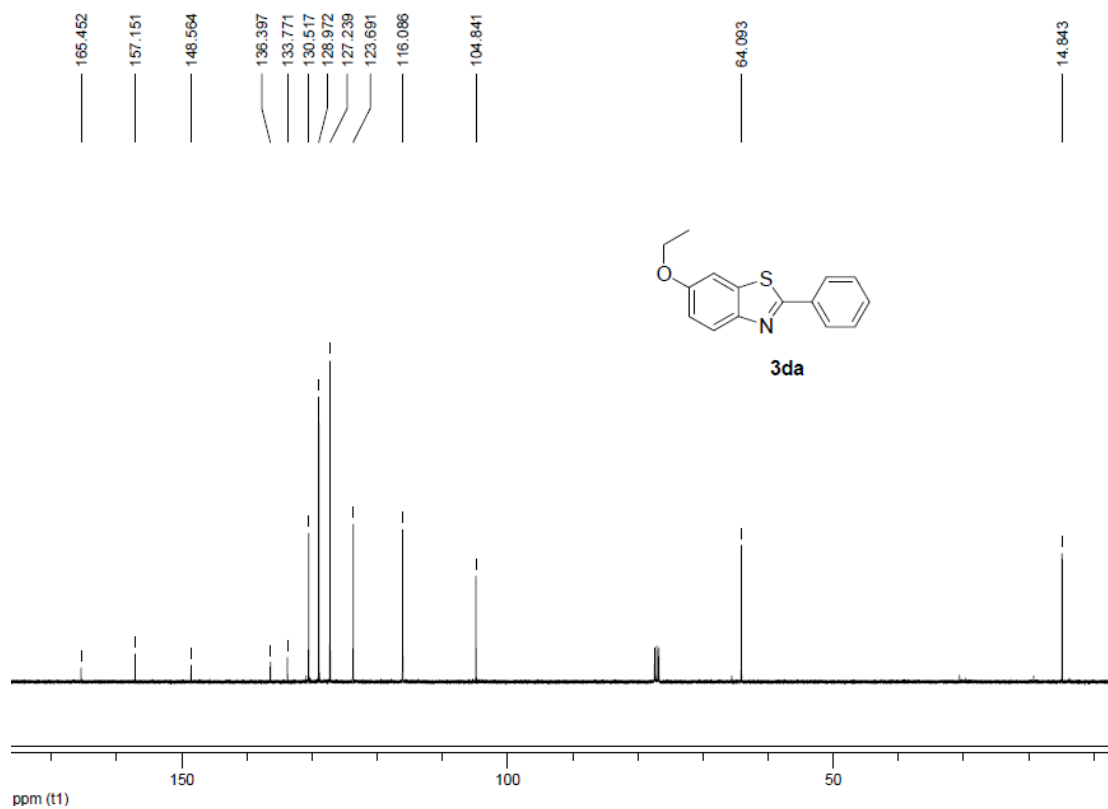

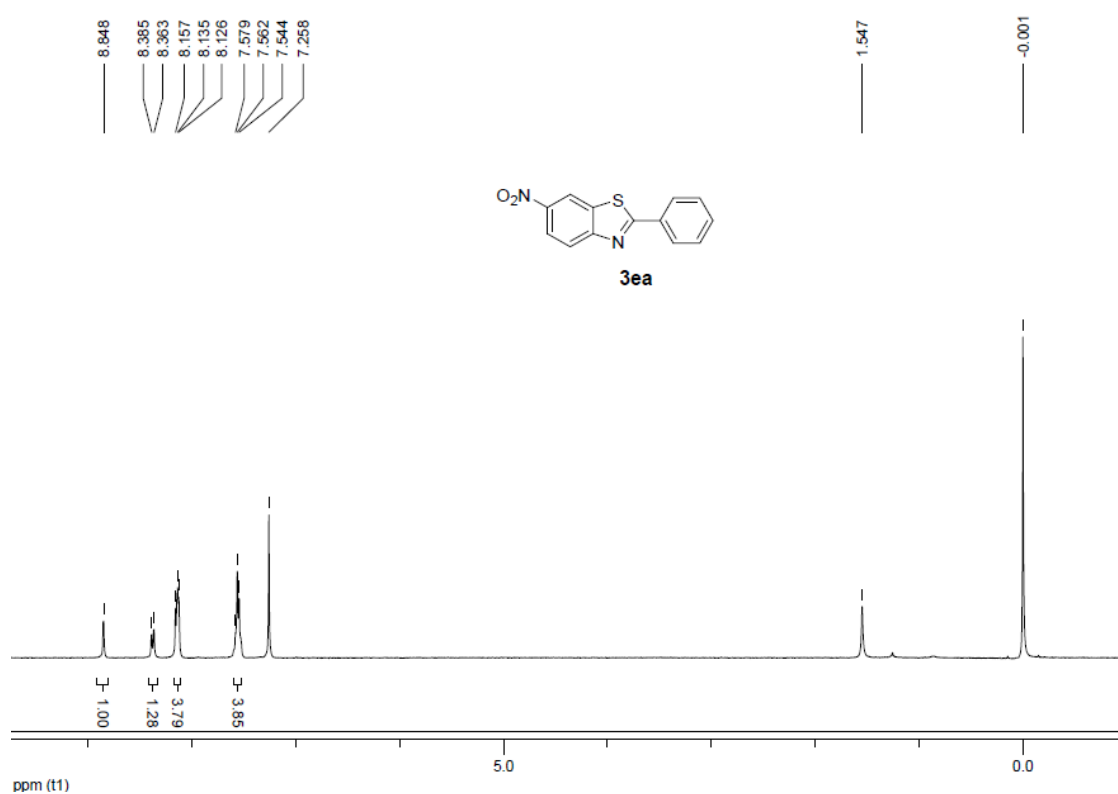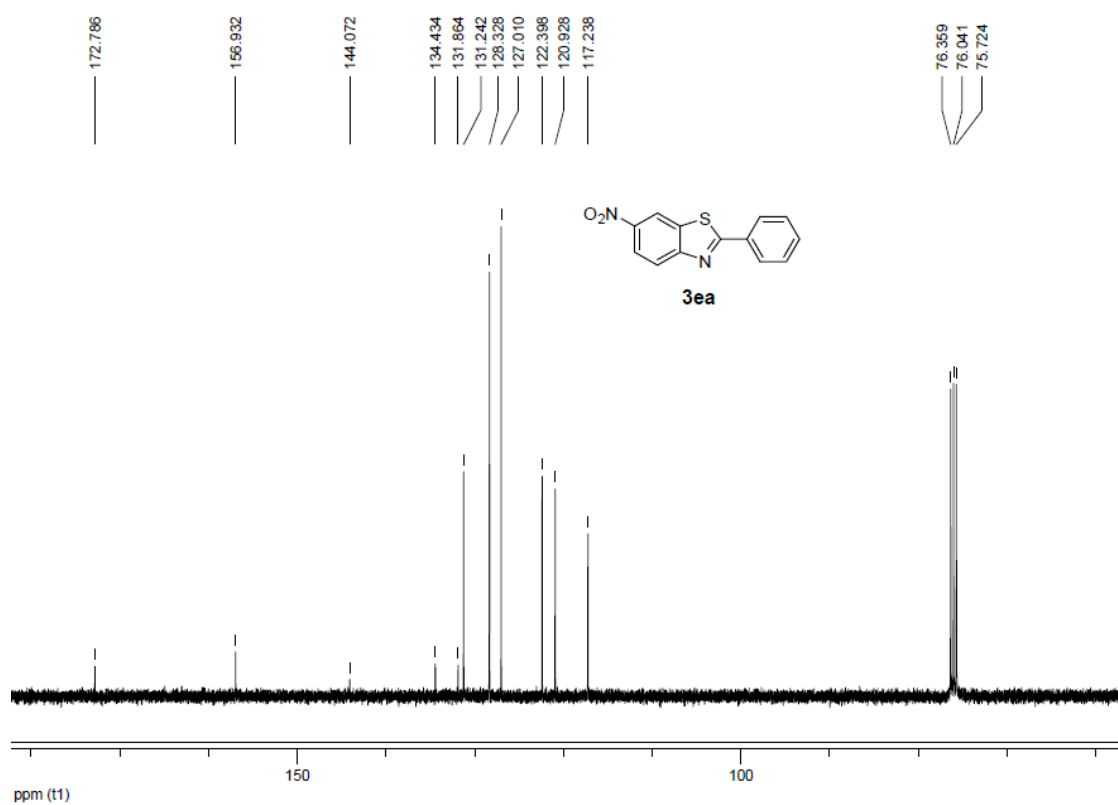

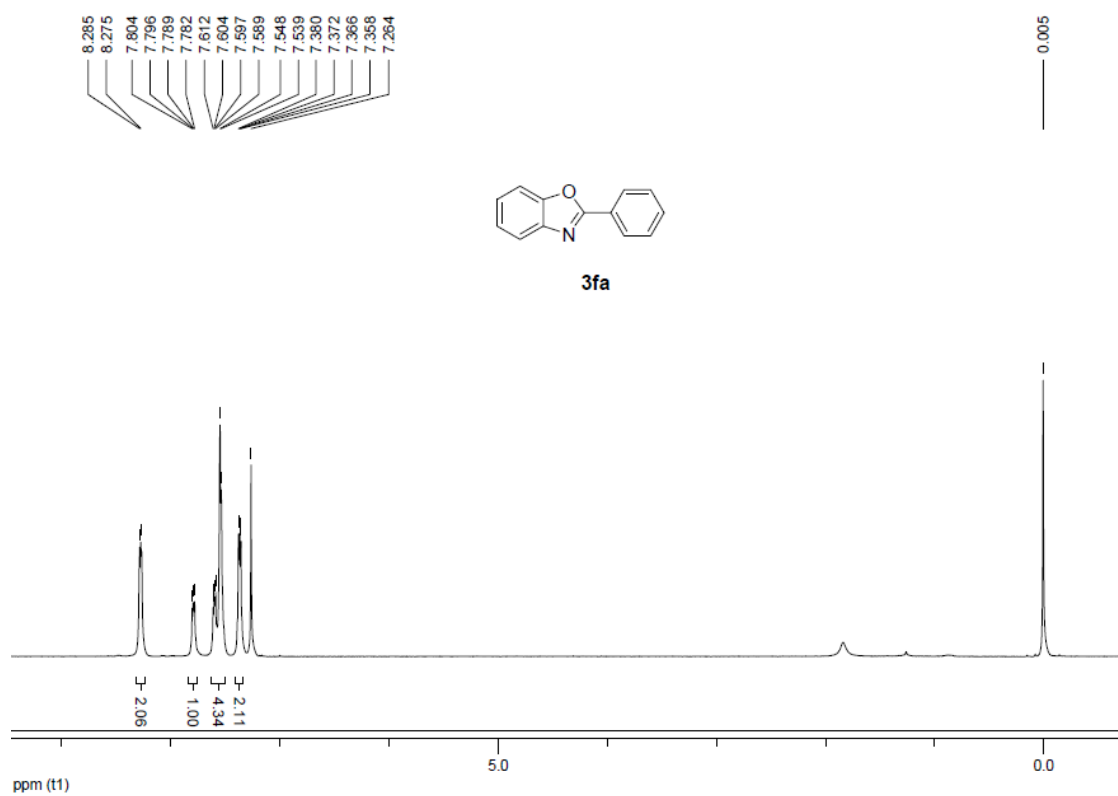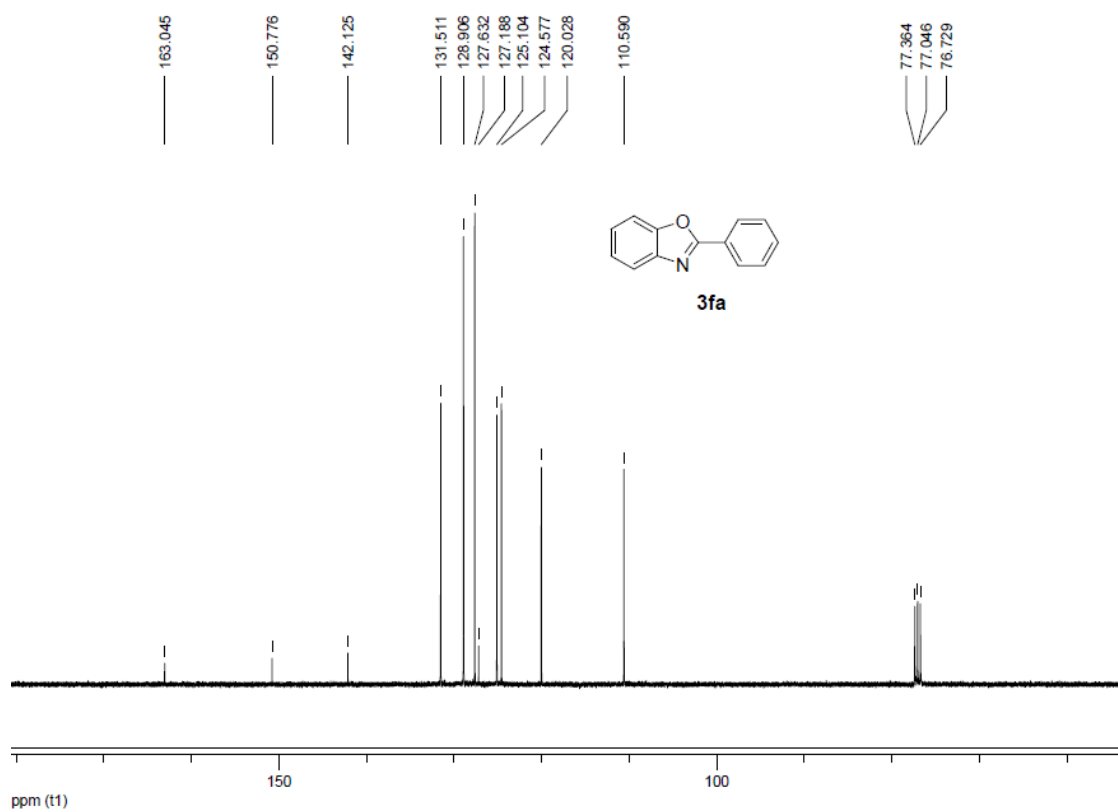

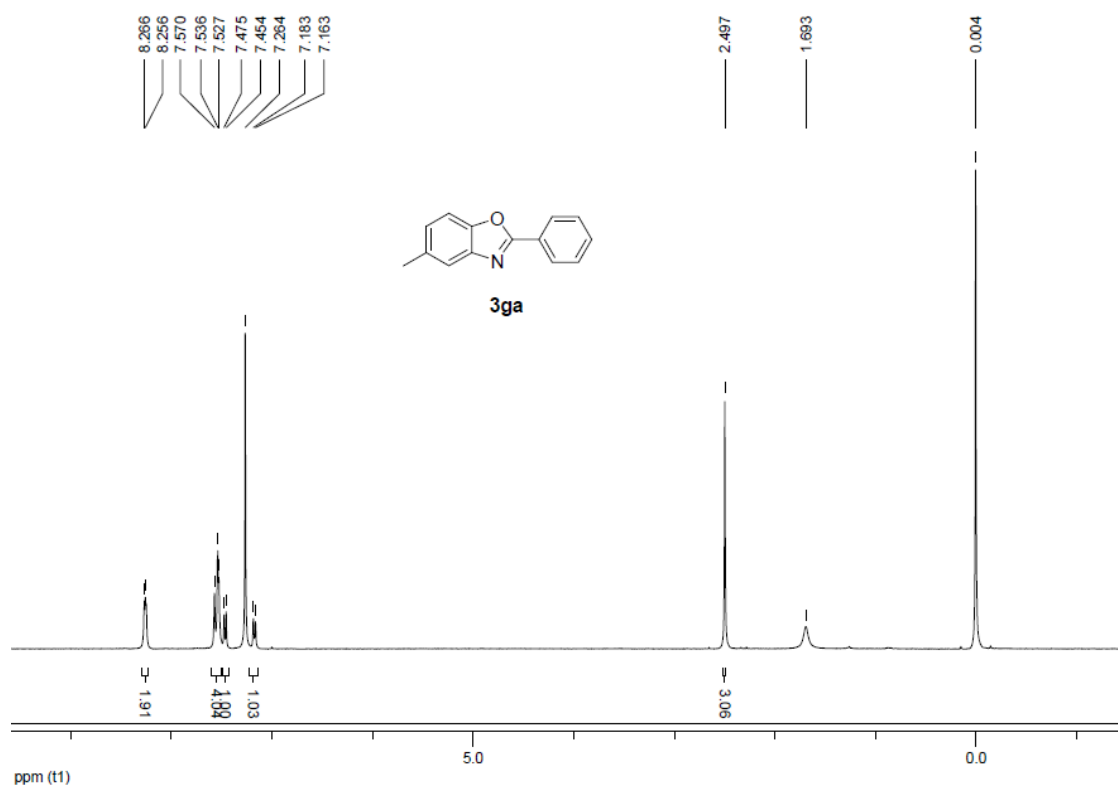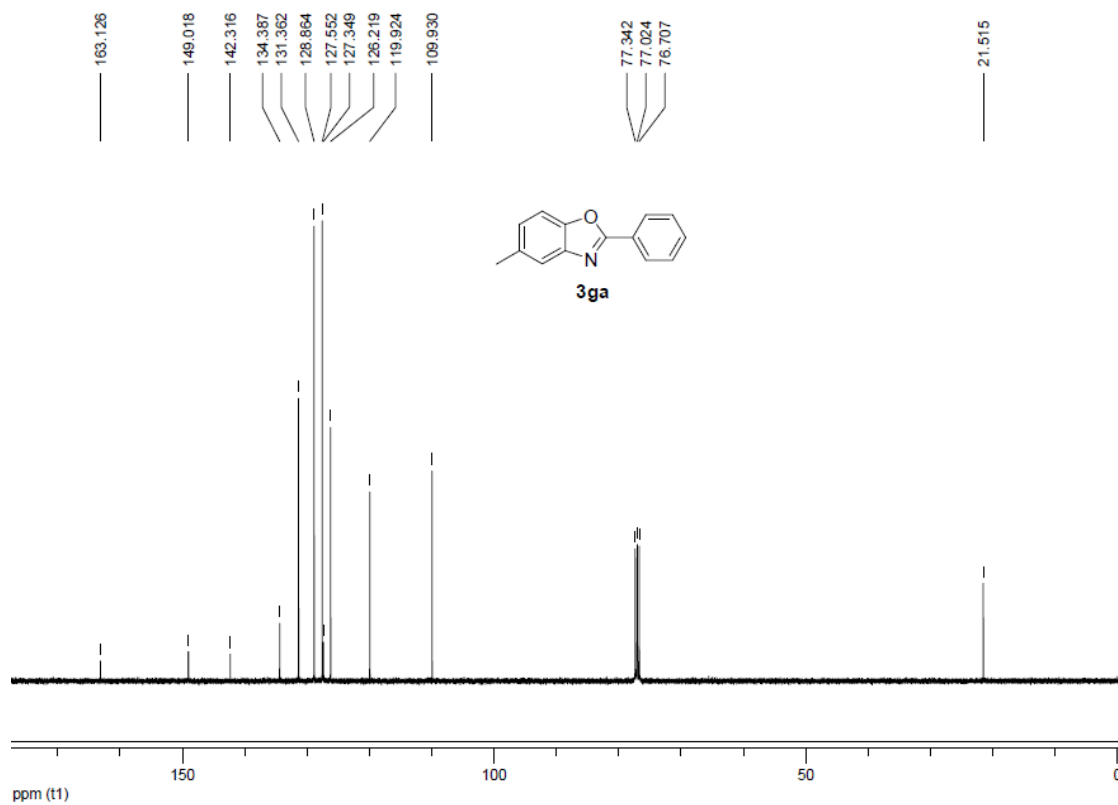

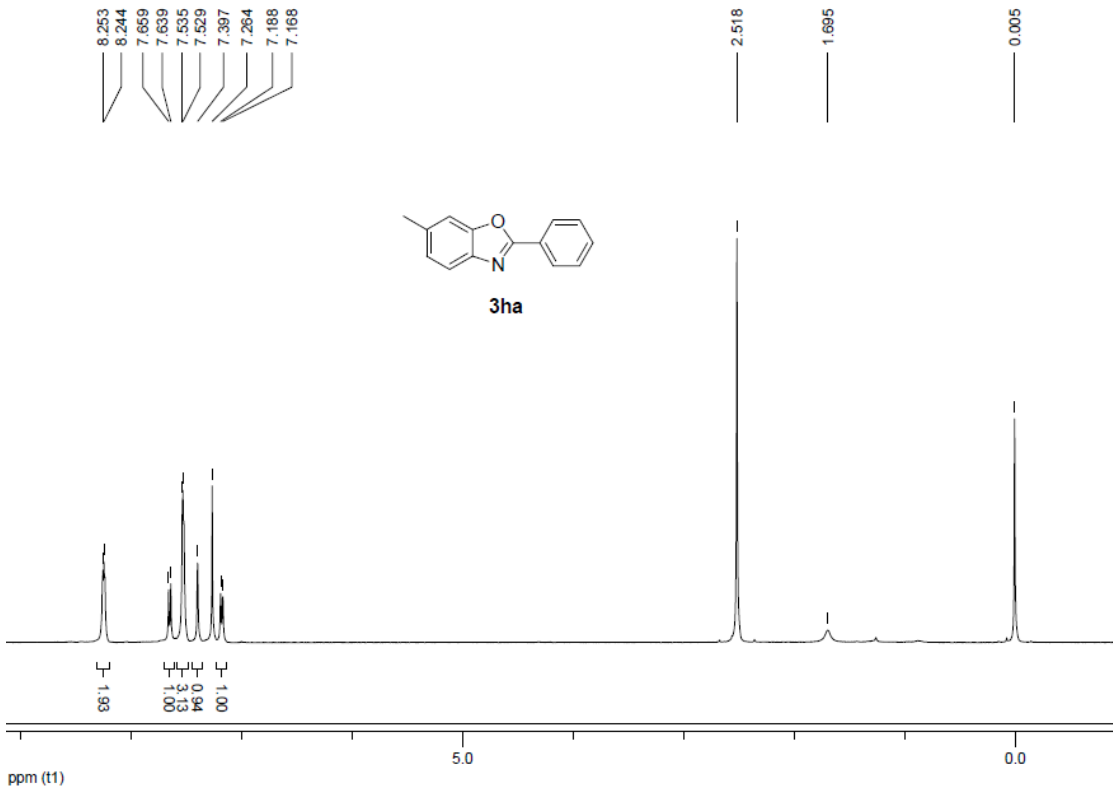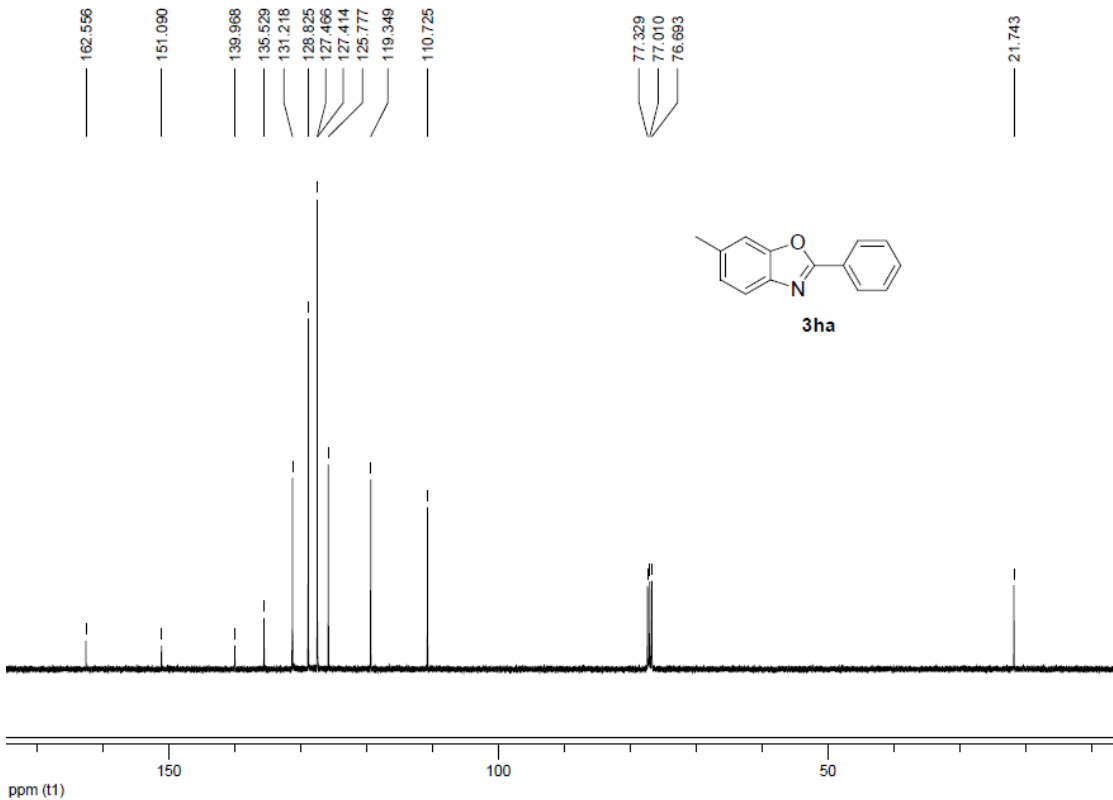

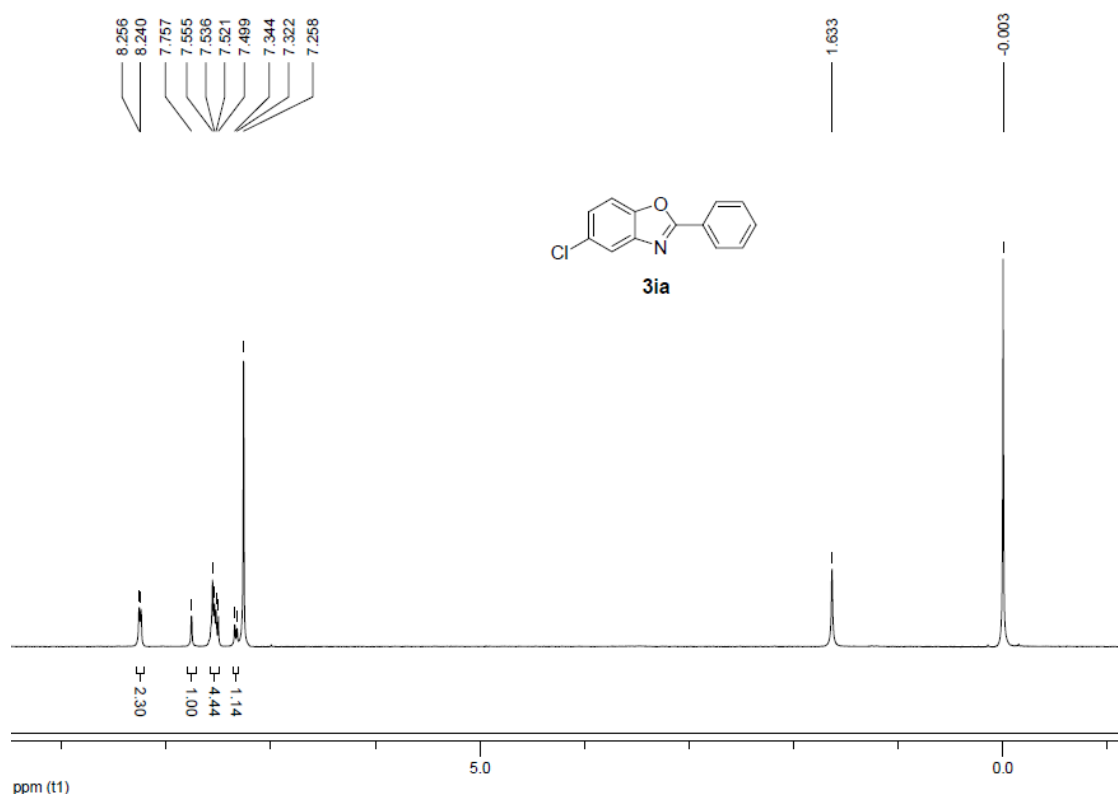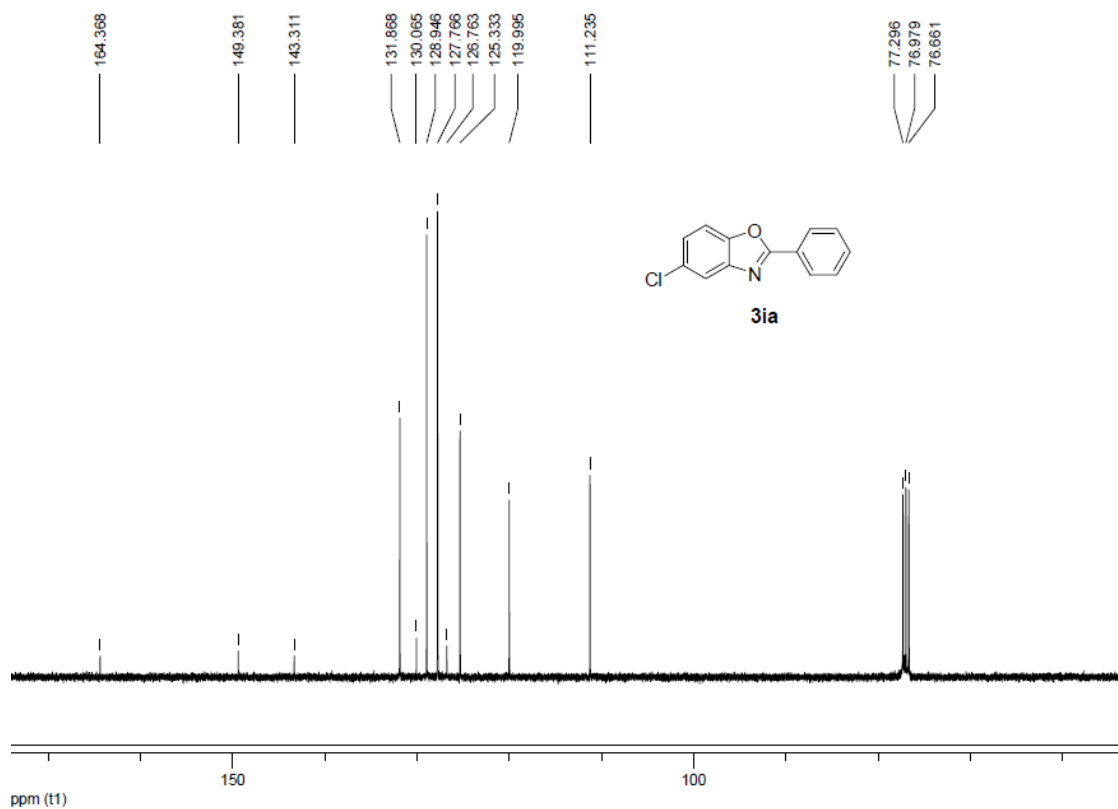



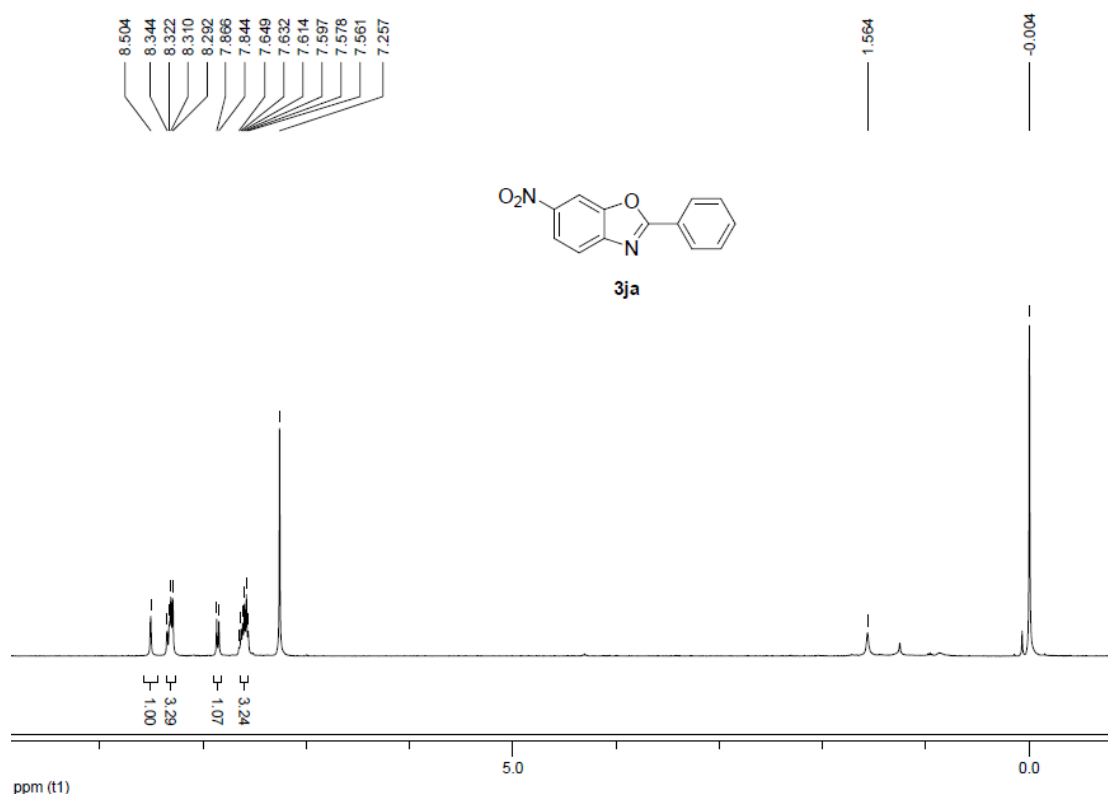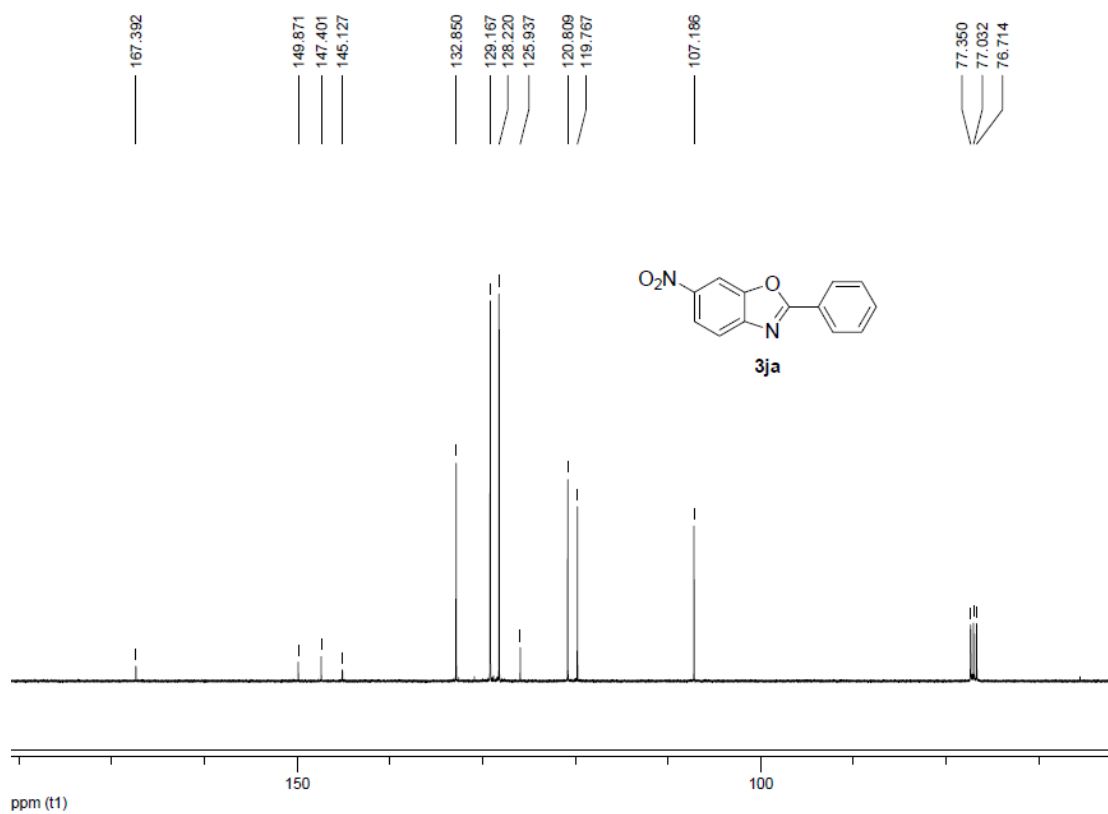

Supplement: c2gc35457h.pdf [file c2gc35457h.pdf]
